1 The association of child maltreatment and systemic  
2 inflammation in adulthood: A systematic review

3 Daniel M Kerr<sup>1\*</sup>, James McDonald<sup>2</sup>, Helen Minnis<sup>1</sup>

4 1- Institute of Health and Wellbeing, University of Glasgow, Glasgow, United Kingdom

5 2- NHS Greater Glasgow and Clyde, Glasgow, United Kingdom

6

7 \*Corresponding author- [Daniel.Kerr@glasgow.ac.uk](mailto:Daniel.Kerr@glasgow.ac.uk)

8

9

## 10 **Abstract**

11 **Introduction:** Child maltreatment (CM) is associated with mental and physical health disorders in  
12 adulthood. Some studies have identified elevated markers of systemic inflammation in adult survivors  
13 of CM, and inflammation may mediate the association between CM with later health problems.  
14 However, there are methodological inconsistencies in studies of the association between CM and  
15 systemic inflammation and findings are conflicting. We performed a systemic review to examine the  
16 association of CM with systemic inflammation in adults.

17 **Methods:** A systematic review was performed following PRISMA . Medline, Embase, Scopus and  
18 PsychInfo were searched for studies of the association of CM with blood markers of inflammation in  
19 adults. Quality was assessed using the Crowe Critical Appraisal Tool. We had intended to perform a  
20 meta-analysis but this was not possible due to variation in study design and reporting.

21 **Results:** Forty-six articles met criteria for inclusion in the review. The most widely reported  
22 biomarkers were C-Reactive Protein (CRP) (n=29), interleukin-6 (n=25) and Tumour Necrosis Factor-  
23 alpha (TNF-a). Four studies were prospective (all relating to CRP) and the remainder were  
24 retrospective. 85% of studies were based in Western settings. In the prospective studies, CM was  
25 associated with elevated CRP in adulthood. Results of retrospective studies were conflicting.  
26 Methodological issues relating to the construct of CM, methods of analysis, and accounting for  
27 confounding or mediating variables (particularly Body Mass Index) may contribute to the uncertainty in  
28 the field.

29 **Conclusions:** There is some robust evidence from prospective studies that CM is associated with  
30 elevated CRP in adulthood. We have identified significant methodological issues in the literature and  
31 have proposed measures that future researchers could employ to improve consistency across  
32 studies. Further prospective, longitudinal, research using robust and comparable measures of CM  
33 with careful consideration of confounding and mediating variables are required to bring clarity to this  
34 field.

35

## 36 **Introduction**

37 Childhood maltreatment (CM) is common worldwide[1, 2]. Studies have consistently shown CM,  
38 particularly multiple and cumulative exposures, to be associated with a range of adverse physical,  
39 psychological, and social outcomes[1-6]. That this association persists after adjustment for  
40 environmental and behavioural factors suggests underlying biological mechanisms which may  
41 mediate the relationship between CM and health and social outcomes in later life[2, 7]. Understanding  
42 the biological correlates of CM will help to clarify the mechanisms linking CM with adverse outcomes,  
43 and offers the prospect of enhanced risk stratification of young people who have been subject to  
44 maltreatment and may identify new treatment targets to break the link between childhood experiences  
45 and adverse physical and mental health outcomes in adulthood[2].

46 Low-grade systemic inflammation is generally defined as 2-3 fold elevations in inflammatory markers  
47 like C-reactive protein (CRP), Interleukin-6 (IL-6) and tumour necrosis factor alpha (TNF- $\alpha$ )[8]. This  
48 represents a chronic low-level activation of the immune system (likely representing excessive  
49 sensitivity to inflammatory stimuli and deficiencies of the anti-inflammatory pathways which would  
50 normally terminate such responses) and is distinguished from high-grade inflammatory states with  
51 markedly elevated inflammatory markers such as occurs in acute infections, severe illnesses, and  
52 auto-inflammatory diseases. Low-grade, systemic inflammation has been identified in adult survivors  
53 of CM[9].

## 54 **Inflammation and physical health disorders**

55 Low-grade inflammation has been associated with a range of physical health conditions such as  
56 cardiovascular disease and diabetes[10, 11]. Notably, a large body of work has associated low-grade  
57 elevations in CRP with cardiovascular events - however subsequent work has questioned the  
58 direction of causality in this relationship[12]. Other inflammatory markers have been associated with  
59 cardiovascular disease, particularly Interleukin-6[10]. A large international study using Mendelian  
60 randomisation techniques has supported a causal relationship between elevated levels of IL-6 and  
61 cardiac disease[10]. Further supporting evidence for the role of low-grade inflammation in  
62 cardiovascular disease is provided by the recent CANTO trial of the specific IL-1 $\beta$  antagonist  
63 Canakinumab which was shown to reduce rates of myocardial infarction, stroke and death in patients

64 treated following an MI with elevated CRP[13].

## 65 **Inflammation and mental health disorders**

66 Low-grade inflammation is also associated with a range mental health disorders. A wide body of work  
67 has associated major depressive disorder with low-grade elevations in inflammatory markers like  
68 CRP, IL-6, and TNF- $\alpha$ [14, 15]. The neurobiological effects of peripheral cytokines may mediate the  
69 relationship between external stressors and depression[14]. Low-grade inflammation is also  
70 associated with conditions like post-traumatic stress disorder (PTSD), schizophrenia, and bipolar  
71 affective disorder[8, 16]. A recent Mendelian randomisation analysis has suggested a causal  
72 relationship between CRP and both schizophrenia and bipolar affective disorder[16].

## 73 **Inflammation and child maltreatment**

74 An emerging body of evidence, therefore, has shown that low-grade systemic inflammation is  
75 associated with physical and mental health disorders and that this relationship is at least partially  
76 causal. Although it is known that CM is associated with low-grade, systemic inflammation [9],  
77 previous reviews have identified significant heterogeneity in the literature particularly in relation to the  
78 definition and ascertainment of CM [17, 18]. Studies have offered varying definitions of CM ranging  
79 from narrowly focused childhood physical or sexual abuse, to more broadly defined Adverse  
80 Childhood Experience (ACEs)[17, 18]. These differing patterns of CM will likely have different effects  
81 on development, contributing to the heterogeneity in the literature. Furthermore, research in this area  
82 has highlighted the role of potential mediators between CM and inflammation (particularly body mass  
83 index (BMI)) and raise questions about the causality of this relationship that were not fully addressed  
84 in previous reviews[19, 20]. In this light, this current review aimed to examine the association between  
85 CM and systemic inflammation in adulthood, with particular consideration of the causality of this  
86 relationship.

## 87 **Methods**

88 We performed a systematic review of the association between CM and low-grade inflammation.  
89 Preferred Reporting Items for Systematic Reviews and Meta-Analyses (PRISMA) guidelines were

90 followed[21]. The search and synthesis plan were pre-specified in a protocol registered with  
91 PROSPERO (CRD42020187027).

## 92 **Research questions**

93 Our primary research question was: “Is CM associated with elevated markers of systemic  
94 inflammation adulthood?”. We also prespecified secondary questions: “Are differences in later life  
95 inflammation associated with specific sub-types, timings, or durations of abuse?” and “What mediates  
96 any association between CM and inflammation?”

## 97 **Inclusion criteria**

98 We included non-randomised observational studies. Our study population was human adults (>18  
99 years of age). Participants could be drawn from healthy samples or clinical (mental or physical health  
100 disorder) samples, however we excluded studies of participants with pro-inflammatory physical health  
101 conditions (in particular autoimmune disease and cancer). Participants could be drawn from  
102 community or hospital-based samples.

103 Our exposure was CM (defined as physical abuse, sexual abuse, emotional abuse, physical neglect  
104 and/or emotional neglect occurring at least once before the age of 18). We did not place any  
105 restrictions on how CM was recorded. Studies could use retrospective or prospective ascertainment;  
106 and could record CM using validated scales, or specific measures developed for their study if this was  
107 described. CM could be reported as an overall construct or broken down into sub-types of abuse and  
108 neglect. Studies could compare between a CM exposed group and a control group or utilise a  
109 continuous measure of CM in a sample.

110 Our outcome was blood levels of inflammatory markers. Any marker of the inflammatory response  
111 measured in the blood was eligible for inclusion. We excluded studies which reported on stimulated  
112 responses (e.g. to stress testing or biological stimulation), studies reporting exclusively on gene  
113 expression, *in vitro* production of inflammatory mediators, and studies exclusively measuring  
114 inflammation in the central nervous system (e.g. CSF).

## 115 **Search strategy**

116 We searched MedLine, Embase, PsychInfo, and Scopus. Our first search term aimed to capture CM.  
117 This included MeSH terms “child abuse”, “child abuse, sexual”, “adult survivors of child abuse”,

118 “physical abuse”, “child, abandoned”, “adolescent, institutionalized”, “adult survivors of child adverse  
119 events” and “adverse childhood experiences”, supplemented by title and abstract searches for related  
120 terms. The second term sought to identify broadly defined inflammatory dysfunction. This included  
121 MeSH terms “inflammation”, “C-reactive protein”, “acute phase proteins”, “tumour necrosis factor  
122 alpha”, “interleukins”, “cytokines”, “immune system”, “fibrinogen”, “leukocytes”, and “lymphocytes”.  
123 This was supplemented by title and abstract searches for related terms.  
124 These terms were combined using the Boolean operator “AND”, and duplicates were removed.  
125 The search was adapted to utilise relevant keywords in the other databases used and full information  
126 is available in S1 file.  
127 This search was supplemented by manual checking of reference lists of retrieved articles and  
128 checking the reference lists of previous reviews in this area.

## 129 **Methods of review**

130 Records were initially screened against inclusion criteria by 1 reviewer, and a 2<sup>nd</sup> reviewer  
131 independently reviewed a sub-sample of 25% of titles. All included articles were then reviewed by a  
132 2<sup>nd</sup> reviewer to confirm that they met inclusion criteria. Disagreements were resolved through  
133 conference with a 3<sup>rd</sup> author.

134 Risk of bias assessment was performed at study level using the Crowe Critical Appraisal Tool v1.4  
135 (<https://conchra.com.au/wp-content/uploads/2015/12/CCAT-form-v1.4.pdf>). This is a tool for  
136 assessment of risk of bias in non-randomised studies. Key components of risk of bias assessment  
137 include sampling, ascertainment of exposure, measurement of outcome, and statistical analysis  
138 including adjustment for relevant confounding variables. The CCAT assigns a total score from 0-40.  
139 According to the tools guidelines studies can be categorised as low quality (<20), moderate quality  
140 (20-29), and high quality (30+). All papers were rated by 1 reviewer, and the 2<sup>nd</sup> reviewer  
141 independently quality rated a sub-sample of 25% of papers. Again, disagreements were resolved  
142 through conference with a 3<sup>rd</sup> author.

143 Data extraction was performed using a pre-specified form. Data extraction was performed by 1  
144 reviewer, with a 2<sup>nd</sup> reviewer independently performing data extraction for a sample of 25% of  
145 included papers.

## 146 **Synthesis**

147 We had intended to perform a meta-analysis of the most widely reported inflammatory markers as  
148 specified in the protocol. A more detailed review of included articles showed that this was not feasible  
149 due to differences in the construct of CM being utilised, incommensurable methods of analysis and  
150 inconsistent accounting for covariates. This is discussed further below. These challenges led us to  
151 conclude that a meta-analysis would be of questionable validity. We have instead presented our  
152 findings in a narrative format with focus on the most widely reported inflammatory markers, and  
153 methodological factors.

## 154 **Results**

155 The PRISMA flow chart is shown in figure 1. Details of reasons for exclusion of articles are shown in  
156 S1 table. A total of 46 papers were included in this review. All papers were rated as moderate to high  
157 quality (CCAT scores ranged from 23-38, median- 32). 30 papers reported on multiple biomarkers.  
158 The frequency with which biomarkers were reported is shown in table 1. The most widely reported  
159 biomarkers were CRP (n=29), interleukin-6 (n=25), and TNF-a (n= 16). Details of these are discussed  
160 below. Details of other biomarkers reported are shown in S2 table.

161 Figure 1- PRISMA Flow Diagram

162 Table 1- Frequency with which biomarkers are reported in included studies

163

| Biomarker                                          | Number of studies |
|----------------------------------------------------|-------------------|
| C-reactive protein (CRP)                           | 29                |
| Interleukin 6 (IL-6)                               | 25                |
| Tumour necrosis factor alpha (TNF-a)               | 16                |
| Interleukin 1b (IL-1b)                             | 8                 |
| Interleukin 10 (IL-10)                             | 6                 |
| Fibrinogen                                         | 5                 |
| Soluble tumour necrosis factor receptor 1 (sTNFR1) | 3                 |
| Soluble tumour necrosis factor receptor 2 (sTNFR2) | 2                 |
| Adiponectin                                        | 2                 |
| Brain derived neurotrophic factor (BDNF)           | 2                 |
| Interferon gamma (IFN-γ)                           | 2                 |
| Interleukin-4 (IL-4)                               | 2                 |
| Resistin                                           | 2                 |
| Transforming growth factor beta (TGFB)             | 2                 |
| White cell count (WCC)                             | 2                 |
| Interleukin 2 (IL-2)                               | 1                 |
| Interleukin 8 (IL-8)                               | 1                 |
| Interleukin 12 (IL-12)                             | 1                 |
| Interleukin 1 receptor antagonist (IL-1RA)         | 2                 |
| Soluble interleukin 6 receptor (sIL-6R)            | 1                 |
| Agouti related protein (AgRP)                      | 1                 |
| Basic fibroblast growth factor (bFGF)              | 1                 |

|                                                                                |   |
|--------------------------------------------------------------------------------|---|
| Betacellulin (BTC)                                                             | 1 |
| Cell-mediated immunity (EBV titre)                                             | 1 |
| Chemokine Ligand-2 (CL-2)                                                      | 1 |
| D-Dimer                                                                        | 1 |
| E-Selectin                                                                     | 2 |
| Glucocorticoid induced tumour necrosis factor ligand (GITR-L)                  | 1 |
| Glycoprotein 130                                                               | 1 |
| Insulin-like growth factor-binding protein 2 (IGFBP2)                          | 1 |
| Interferon induced T-cell alpha chemoattractant (I-TAC)                        | 1 |
| Monocyte chemoattractant protein 1 (MCP-1)                                     | 1 |
| Mucosae-associated epithelial chemokine (MEC)                                  | 1 |
| Neurotrophin-4                                                                 | 1 |
| Platelet derived growth factor (PDGF)                                          | 1 |
| Salivary alpha amylase (sAA)                                                   | 1 |
| Stem cell factor (SCF)                                                         | 1 |
| Soluble intracellular adhesion molecule 2 (sICAM2)                             | 1 |
| Soluble immunoglobulin A (sIgA)                                                | 1 |
| Thymus expressed chemokine (TECK)                                              | 1 |
| Tumour necrosis factor related apoptosis inducing ligand-receptor 4 (TRAIL-R4) | 1 |
| Vascular endothelial growth factor (VEGF)                                      | 1 |
| Von Willebrand Factor (vWF)                                                    | 1 |

164

## 165 **Methodological features**

166 Over 90% (n= 42) of the 46 included studies recorded CM exposure retrospectively, with the  
 167 Childhood Trauma Questionnaire (CTQ) being the most widely reported scale (n=29). CTQ is a 28-  
 168 item self-report measure of childhood trauma, which can be considered as a total score, or as  
 169 subscales representing physical abuse, physical neglect, emotional abuse, emotional neglect, and  
 170 sexual abuse[22]. Of papers utilising the CTQ, 13 reported only on the total score, 8 reported on  
 171 subscales only, and 8 reported on both. 13 papers reported on the CTQ as a dichotomous variable  
 172 (using a recognised cut-off point to define high versus low scores) and 16 analysed CTQ as a  
 173 continuous variable. The remaining studies utilised their own measures of CM based on their dataset  
 174 (n=9) or other standardised scales (n=8). After CTQ the most widely used standardised scale was the  
 175 Early Trauma Inventory (ETI)[23]. This is a 56-item self-report scale which generates 5 variables- total  
 176 number of traumas, physical trauma, emotional trauma, sexual trauma, and general traumas. General  
 177 trauma includes a range of adverse exposures including parental separation, bereavement, natural  
 178 disaster, and political violence. Most studies did not specify the timing or duration of CM in their  
 179 analysis.

180 There was significant variation in statistical techniques used and where multivariate analysis was  
 181 performed there was inconsistency as to which covariates were included. Eighty-five percent (n=39)  
 182 of the studies were conducted in Western settings (North America, Europe, Australasia), with the



183 remainder taking place in Brazil (n=4), China (n=2), and Japan (n=1). Ten studies were restricted to  
184 female participants, and one was restricted to males.

## 185 **C-reactive protein**

186 The association between CM and CRP was reported in 29 papers (full details in table 1a and 1b).  
187 Nine reported on clinical samples and 20 on non-clinical samples.

188

**Table 1a: Papers reporting CRP: Clinical populations**

| Author             | Sample details                                                                                                                                                      | Sample Size                 | Sample demographics                                                                                                                                                                                                                                                | Abuse measure                                                            | CCAT score | Main findings                                                                                                                                                                                                                                                                                                       |
|--------------------|---------------------------------------------------------------------------------------------------------------------------------------------------------------------|-----------------------------|--------------------------------------------------------------------------------------------------------------------------------------------------------------------------------------------------------------------------------------------------------------------|--------------------------------------------------------------------------|------------|---------------------------------------------------------------------------------------------------------------------------------------------------------------------------------------------------------------------------------------------------------------------------------------------------------------------|
| Aas 2017 [29]      | Participants in TOPS study of psychotic disorders in Oslo Norway. Consecutively recruited outpatients with schizophrenia and bipolar disorder and matching controls | 483                         | <u>Schizophrenia:</u><br>Age= 28.6 (9.3)<br>Female= 55 (41.0%)<br><br><u>Bipolar Disorder</u><br>Age= 32.2 (11.7)<br>Female= 73 (59%)<br><br><u>Control:</u><br>Age= 30.9 (7.5)<br>Female= 86 (41%)                                                                | CTQ- analysed as number of types of abuse/neglect.                       | 36         | Abuse severity was associated with CRP and BMI. On ANCOVA significant effect of abuse severity for elevated but this was non-significant after BMI was added to the model.                                                                                                                                          |
| Counotte 2019 [24] | Participants in a study of participants with psychotic disorders, ultra-high risk for psychosis (UHR), unaffected siblings, and controls, in the Netherlands.       | 117                         | <u>Psychosis</u><br>Age= 25.5 (23-30)<br>Male= 6 (15.8%)<br><br><u>UHR</u><br>Age= 24.0 (20-29)<br>Female= 6 (54.5%)<br><br><u>Siblings</u><br>Age= 25.5 (21.3- 30.0)<br>Female= 12 (41.4%)<br><br><u>Controls:</u><br>Age= 24.0 (21.0-26.0)<br>Female= 21 (53.8%) | CTQ- dichotomised; total and sub-components                              | 38         | No significant association of CTQ with CRP in models which adjust for age, sex, BMI, smoking, drug use, and education.                                                                                                                                                                                              |
| Fanning 2015 [30]  | Community recruited participants with and without personality disorder in a larger study about the correlates of impulsive aggression in Chicago USA                | 134                         | <u>Personality Disorder</u><br>Age= 36.0 (7.7)<br>Female= 38 (48.1%)<br><br><u>Control:</u><br>Age= 31.9 (9.2)<br>Female= 30 (54.5%)                                                                                                                               | CTQ- separated to abuse and neglect sub-components; continuous analysis. | 30         | Abuse but not neglect was correlated with CRP in an unadjusted analysis.                                                                                                                                                                                                                                            |
| Heggul 2012 [31]   | Inpatients with first episode psychosis (FEP) and healthy controls in the UK. Participants had no significant physical illnesses.                                   | 195                         | <u>FEP</u><br>Age= 27.0 (0.6)<br>Female= 60 (57.5%)<br><br><u>Controls:</u><br>Age= 26.3 (0.6)<br>Female= 67 (32.3%)                                                                                                                                               | CTQ- dichotomous; total and subcomponents                                | 33         | In an unadjusted comparison of patients with and without CM, and controls there was a non-significant trend towards higher CRP in patients with a history of CM. There were significant difference in CRP when grouped by sexual abuse with the highest CRP level in the group of patients exposed to sexual abuse. |
| Imai 2008 [25]     | Female outpatients with PTSD and matching controls in Japan.                                                                                                        | 40 (participants with PTSD) | Age= 38.3 (10.1)<br>Female= 100%                                                                                                                                                                                                                                   | CTQ- total; continuous                                                   | 37         | No correlation of CTQ (total or subscales) with CRP in an unadjusted analysis                                                                                                                                                                                                                                       |

|                     |                                                                                                                                                                                                                                                                                                      |     |                                                                                                                                                                                                                                                  |                                 |    |                                                                                                                                                                                                                                                                                                                      |
|---------------------|------------------------------------------------------------------------------------------------------------------------------------------------------------------------------------------------------------------------------------------------------------------------------------------------------|-----|--------------------------------------------------------------------------------------------------------------------------------------------------------------------------------------------------------------------------------------------------|---------------------------------|----|----------------------------------------------------------------------------------------------------------------------------------------------------------------------------------------------------------------------------------------------------------------------------------------------------------------------|
|                     | Participants had no significant physical illnesses. Analysis of inflammation and abuse only included the PTSD group.                                                                                                                                                                                 |     |                                                                                                                                                                                                                                                  |                                 |    |                                                                                                                                                                                                                                                                                                                      |
| Palmos 2019 [26]    | Participants retrieved from 2 studies. Controls recruited from SeLCoH study of mental and physical health in the general population in London. MDD participants recruited from the control arm of the ADD trial of metyrapone in depression. Participants had no other mental or physical illnesses. | 465 | <u>MDD:</u><br>Age= 48.50 (16.14)<br>Female= 79 (48.1%)<br><br><u>Control</u><br>Age= 48.50 (16.14)<br>Female= 158 (52.5%)                                                                                                                       | CTQ total score; dichotomised   | 37 | No significant association of CM with CRP in model adjusted for age, gender, ethnicity, smoking and BMI.                                                                                                                                                                                                             |
| De Punder 2018 [28] | Patients with depression were recruited from an affective disorders clinic and controls from public advertisements. Participants did not have other mental or physical illnesses. Neither patients or controls taking psychotropic medications. Study in Berlin Germany                              | 86  | <u>MDD and CM</u><br>Age= 38.09 (11.36)<br>Female= 14<br><br><u>MDD no CM</u><br>Age= 32.61 (11.74)<br>Female= 18<br><br><u>Control and CM</u><br>Age= 38.09 (11.36)<br>Female= 14<br><br><u>Control no CM</u><br>Age= 33.9 (9.77)<br>Female= 13 | ETI- Dichotomised               | 31 | Significant difference in CRP between groups which attenuated to non-significance after adjusting for BMI and smoking.                                                                                                                                                                                               |
| Quide 2019 [32]     | Participants were outpatients with schizophrenia/ schizoaffective disorder, bipolar disorder, and healthy controls from Australia. All aged 18-65 with no significant physical illnesses                                                                                                             | 209 | <u>Schizophrenia:</u><br>Age= 41.78 (11.33)<br>Female= 29<br><br><u>Bipolar Disorder:</u><br>Age= 38.11 (12.31)<br>Female= 46<br><br><u>Control:</u><br>Age= 36.17 (11.57)<br>Female= 34<br><br>BMI not noted.                                   | CTQ- Sub-components; continuous | 35 | No association of maltreatment with CRP in control or bipolar group. In schizophrenia group significant association of sexual abuse and CRP in a model also significant for sex and anti-psychotic dose. No other significant associations of abuse sub-types in schizophrenia group. All analyses were unadjusted.. |
| Zeugmann 2013 [27]  | Inpatients with MDD in Germany.                                                                                                                                                                                                                                                                      | 25  | Age= 47.8 (15.02)<br>Female= 17 (68%)                                                                                                                                                                                                            | CTQ- subcomponents; continuous  | 31 | No association of CTQ with CRP in an unadjusted analysis.                                                                                                                                                                                                                                                            |

**Table 1b Papers reporting CRP: Non-clinical populations**

| Author                      | Sample details                                                                                                                                                                 | Sample Size | Sample demographics                         | Abuse measure                                                                                                                                                                                                                                                                                                                               | CCAT score | Main findings                                                                                                                                                                                                                                                                                       |
|-----------------------------|--------------------------------------------------------------------------------------------------------------------------------------------------------------------------------|-------------|---------------------------------------------|---------------------------------------------------------------------------------------------------------------------------------------------------------------------------------------------------------------------------------------------------------------------------------------------------------------------------------------------|------------|-----------------------------------------------------------------------------------------------------------------------------------------------------------------------------------------------------------------------------------------------------------------------------------------------------|
| Anderson 2018 [36]          | Mothers of participants in the ALSPAC longitudinal cohort in Bristol, UK. Mothers were invited to participate an average of 18 years after enrolment in the study.             | 3612        | Age= 48.13 (4.35)<br>Female= 100%           | Childhood adversity variables were extracted from questionnaire items administered earlier in course of cohort, and combined using factor analysis. The paper includes wider measures of childhood adversity, of relevance to this review are data on sexual abuse and non-sexual abuse (physical, abuse, and emotional abuse and neglect). | 33         | No association of sexual or non-sexual abuse with CRP in model which adjusted for age at assessment, socioeconomic status, ethnicity, and BMI.<br>No association of cumulative adversity with CRP.                                                                                                  |
| Baldwin 2018 [33]           | E-Risk twin study, a longitudinal birth cohort of twins born in England and Wales in 1994-1995. Outcomes assessed at age 18.                                                   | 1789..      | Age= 18.4 (0.36)<br>Female= 912 (51%)       | Childhood Victimization- Prospectively collected data on physical abuse and neglect, emotional abuse and neglect and exposure to domestic violence.                                                                                                                                                                                         | 36         | Greater exposure to childhood victimisation associated with higher CRP in total sample. This was driven by female participants. On gender stratified analysis effect was significant in females only. Remained significant after adjusting for SES, waist-hip ratio, and latent genetic risk score. |
| Bertone-Johnstone 2012 [47] | Participants in Nurses Health Study II. A cohort of female nurses in USA recruited in 1989. A sub-sample was invited to provide blood samples between 1996-1999.               | 702.        | Age= 48.9 (SD not reported)<br>Female= 100% | Physical abuse- Adapted Revised Conflict Tactics Scale.<br>Sexual abuse- Adapted Sexual Experiences Survey                                                                                                                                                                                                                                  | 33         | Elevated CRP was associated with adolescent SA only in models adjusted for age, ethnicity, and SES. Association non-significant after adjustment for BMI. There was no association with PA.                                                                                                         |
| Boeck 2016 [43]             | Cohort study of new mothers recruited in Ulm Germany. Participant had no mental or physical health problems. Bloods collected 3 months post-partum                             | 30          | Age= 31.6 (6.0)<br>Female= 100%             | CTQ- total and subcomponents; dichotomised                                                                                                                                                                                                                                                                                                  | 35         | CM not associated with CRP on adjusted or unadjusted analyses.                                                                                                                                                                                                                                      |
| Carpenter 2012 [37]         | Sub-sample of a larger cohort study of stress and biomarkers based in Providence USA. Participants were community based with no history of mental or physical health problems. | 92          | Age= 30.5 (9.2)<br>Female= 47 (51.1%)       | CTQ- total and subcomponents; continuous.                                                                                                                                                                                                                                                                                                   | 35         | No correlation between CTQ (total or sub-components) and CRP.                                                                                                                                                                                                                                       |
| Danese 2007 [9]             | Participants in longitudinal cohort study in Dunedin New Zealand. Bloods collected at visit at age 32.                                                                         | 892.        | Age= 32<br>Female= 435 (48.8%)              | Prospectively recorded childhood maltreatment including parental rejection and harsh discipline, and retrospective report of physical and sexual abuse.                                                                                                                                                                                     | 35         | CM associated with elevated CRP, in unadjusted analyses and models adjusting for childhood confounders, and adult health and behaviour, including overweight.                                                                                                                                       |

|                    |                                                                                                                                                                                                               |     |                                                                                                                            |                                                                                     |    |                                                                                                                                                                                                                                                                                                                                                                                                                                                          |
|--------------------|---------------------------------------------------------------------------------------------------------------------------------------------------------------------------------------------------------------|-----|----------------------------------------------------------------------------------------------------------------------------|-------------------------------------------------------------------------------------|----|----------------------------------------------------------------------------------------------------------------------------------------------------------------------------------------------------------------------------------------------------------------------------------------------------------------------------------------------------------------------------------------------------------------------------------------------------------|
| Finy 2018 [19]     | Pregnant woman recruited in Ohio USA. Participants were physically healthy.                                                                                                                                   | 214 | Age= 29.38 (4.93)<br>Female= 100%                                                                                          | CTQ- subscales of physical abuse, sexual abuse, and emotional abuse; continuous     | 35 | CTQ score was positively correlated with CRP. In structural equation models childhood abuse had a significant indirect effect on CRP, which was mediated by BMI.                                                                                                                                                                                                                                                                                         |
| Gong 2019 [38]     | Study of Chinese University students exploring association of schizotypal personality traits, childhood abuse, and CRP. Participants had no physical or mental illnesses or family history of mental illness. | 224 | Age= 18.86 (0.86)<br>Female= 74 (33%)                                                                                      | CTQ- total and subcomponents; continuous                                            | 31 | Analyses were stratified by gender. No correlation between total CTQ or subscales with CRP in males or females in an unadjusted analysis.                                                                                                                                                                                                                                                                                                                |
| Gouin 2012 [39]    | Participants in a study of stress in older adult dementia caregivers in Canada. Participants excluded if had illnesses which affect immune system, or BMI >40.                                                | 130 | <u>Abused</u><br>Age= 62.47 (12.07)<br>Female= 46 (80.7%)<br><br><u>Non-Abused</u><br>Age= 67.2 (13.74)<br>Sex= 61 (83.5%) | CTQ- total (excluding physical neglect); dichotomised                               | 35 | No association of abuse with CRP in a model adjusting for age, sex, ethnicity, education, BMI, marital status, sleep disturbance, and caregiving status.                                                                                                                                                                                                                                                                                                 |
| Hartwell 2013 [40] | Control group in a larger study on gender differences in stress responses in cocaine dependency in South Carolina USA. Participants were non-cocaine using controls with no mental or physical illnesses.     | 39  | Age= 35.69 (12.0)<br>Female= 20 (51.3%)                                                                                    | ETI- Number of traumas                                                              | 36 | There was no association of ETI with CRP in a model adjusted for gender and smoking status.                                                                                                                                                                                                                                                                                                                                                              |
| Kim 2019 [41]      | Healthy students at a university in Texas USA.                                                                                                                                                                | 85  | Age=21.0 (no SD)<br>Female= 61 (71.7%)                                                                                     | ACEs questionnaire- specific analyses based on items on abuse and neglect           | 29 | No significant association of abuse or neglect with CRP in unadjusted analysis and analysis adjusted for age, gender, ethnicity, parental education, depressive symptoms and perceived stress.                                                                                                                                                                                                                                                           |
| Matthews 2014 [20] | Participants in the Pittsburgh site of the SWAN cohort study of menopause and aging.                                                                                                                          | 326 | Age= 45.7 (2.5)<br>Female= 100%                                                                                            | CTQ- total and subcomponents; dichotomised                                          | 37 | SA, EA, EN, PN, and total number of abuse types were associated with higher CRP over 7 years adjusting for age, race, education, smoking status, medications, cardiovascular disease, hormone therapy and depressive symptoms. Generalised estimating equations showed that emotional and sexual abuse, physical neglect, and total numbers of types of abuse related to CRP through BMI. Emotional abuse and neglect related to CRP independent of BMI. |
| Nikulina 2014 [35] | Prospective cohort study of court substantiated cases of child neglect and matching controls from a midwestern city in the USA. Cases were recruited between 1967-1971.                                       | 528 | Age= 41 (no SD)<br>Female= 269 (51%)                                                                                       | Court substantiated cases of child neglect                                          | 29 | Overall no significant association of childhood neglect with CRP in a model that adjusted for BMI. Significant interaction by race with increased CRP associated with neglect in white ethnicity only.                                                                                                                                                                                                                                                   |
| Osborn 2019 [34]   | Offspring of participants of a longitudinal cohort of abuse/neglect in Midwestern USA. The primary aim of this study was to assess the                                                                        | 443 | Age= 23.4 (5.23)<br>Female= 215 (48.5%)<br>BMI not reported                                                                | Prospective- CPS documentation. Retrospective- LONGSCAN and Conflict Tactics Scale. | 30 | Prospective maltreatment was significantly associated with elevated CRP. When analysed by abuse type this was only significant for physical abuse. No retrospective measure was associated with CRP.                                                                                                                                                                                                                                                     |

|                         |                                                                                                                                                                                                                                                                                                                           |                                               |                                                                                                                                                                                                                  |                                                                                                                                                                                                                                       |    |                                                                                                                                                                                                                                                                                                                                           |
|-------------------------|---------------------------------------------------------------------------------------------------------------------------------------------------------------------------------------------------------------------------------------------------------------------------------------------------------------------------|-----------------------------------------------|------------------------------------------------------------------------------------------------------------------------------------------------------------------------------------------------------------------|---------------------------------------------------------------------------------------------------------------------------------------------------------------------------------------------------------------------------------------|----|-------------------------------------------------------------------------------------------------------------------------------------------------------------------------------------------------------------------------------------------------------------------------------------------------------------------------------------------|
|                         | agreement between prospective and retrospective measures of maltreatment, and how these predict CRP.                                                                                                                                                                                                                      |                                               |                                                                                                                                                                                                                  |                                                                                                                                                                                                                                       |    |                                                                                                                                                                                                                                                                                                                                           |
| Pinto Pereira 2019 [45] | 1) 1958 British Birth Cohort (BBC): A longitudinal cohort of all born in one week in 1958. Bloods collected at visit age 45.<br>2) Midlife in United States (MIDUS): Cohort of adults 25-75 in USA recruited in 1994-1995. 2 <sup>nd</sup> wave of data collection (MIDUS-II) followed up original sample 10 years later. | British Birth Cohort= 7661<br><br>MIDUS= 1255 | <u>British Birth Cohort:</u><br>Age= 45.2 (44.3-46.0) (mean and range)<br>Female= 3828 (50%)<br><br><u>MIDUS</u><br>Age<br>- Male= 57.9 (36-86)<br>- Female= 56.9 (35-86)<br>Female= 713 (56.8%)                 | Physical, emotional and sexual abuse; emotional neglect and physical neglect (British Birth Cohort only). Derived from study questions. All measures retrospective except from prospective record of neglect in British Birth Cohort. | 25 | In linear regression adjusted for age, race, gender, and other types of abuse; physical abuse was associated with increased CRP in BBC but not MIDUS. The association of physical abuse and CRP in BBC attenuated to non-significance after adjusting for BMI. Other forms of maltreatment were not associated with CRP in either sample. |
| Powers 2016 [42]        | Participants were a subgroup with type 2 diabetes drawn from a larger study of risk factors for PTSD in low socioeconomic status urban African-American women in Atlanta Georgia.                                                                                                                                         | 40                                            | Age= 51.88 (7.57)<br>Female= 100%                                                                                                                                                                                | CTQ- total; continuous                                                                                                                                                                                                                | 30 | CM was not correlated with CRP in an unadjusted analysis.                                                                                                                                                                                                                                                                                 |
| Rooks 2012 [48]         | Male middle aged twins born between 1946-1956 from the Vietnam Era Twin Registry in USA.                                                                                                                                                                                                                                  | 482                                           | Age= 55(3)<br>Female= 0                                                                                                                                                                                          | ETI- total; continuous                                                                                                                                                                                                                | 32 | Trauma exposure was associated with increased CRP. When adjusted for obesity relationship attenuated to non-significance.                                                                                                                                                                                                                 |
| Schrepf 2014 [49]       | Participants in MIDUS-2 biomarker project in USA.                                                                                                                                                                                                                                                                         | 687                                           | Age= 52.2 (10.9)<br>Female=56%<br>BMI not stated                                                                                                                                                                 | CTQ- subcomponents; continuous                                                                                                                                                                                                        | 31 | CRP was correlated with emotional abuse, physical abuse, and physical neglect. No significant correlation with sexual abuse or emotional neglect. Analysis was unadjusted.                                                                                                                                                                |
| Slopen 2010 [46]        | Participants in MIDUS cohort in USA                                                                                                                                                                                                                                                                                       | 999                                           | <u>White Participants (n=822):</u><br>Age= 58.66 (11.65)<br>Female= 52.8%<br>BMI= 29.14 (5.95)<br><br><u>African-American Participants (n=177):</u><br>Age= 54.15 (10.71)<br>Female= 67.23%<br>BMI= 33.35 (8.89) | Early life adversity questionnaire                                                                                                                                                                                                    | 33 | No association of early life adversity with CRP in analysis adjusted for age, gender, ethnicity, cardiovascular disease, and BMI.                                                                                                                                                                                                         |
| Thurston 2017 [44]      | Participants in the MsHeart study of peri- and post-menopausal women aged 40-60 in Pittsburgh USA. Excluded if history of significant physical illness                                                                                                                                                                    | 286                                           | <u>Abuse/Neglect</u><br>Age= 53.68 (4.11)<br>Female= 100%<br><br><u>No abuse/neglect</u><br>Age= 54.28 (3.90)<br>Female= 100%                                                                                    | CTQ- total and subcomponents; dichotomised                                                                                                                                                                                            | 29 | No association of CM with CRP in unadjusted analysis.                                                                                                                                                                                                                                                                                     |

Table 1 Legend: BMI- Body mass index, CM- Child Maltreatment, CRP- C-reactive protein, CTQ- Childhood Trauma Questionnaire, EA- Emotional abuse, EN- Emotional neglect, ETI- Early Trauma Inventory, FEP- First Episode Psychosis, MDD- Major Depressive Disorder, PA- Physical abuse, PN- Physical abuse, SA- Sexual abuse, UHR- Ultra-high risk

189 All papers reporting clinical samples were retrospective and all but one used CTQ to record CM. Four  
190 studies did not find any association between CM and CRP[24-27]. A further two studies found initially  
191 significant associations between CM measures and CRP, which attenuated to non-significance on  
192 adjustment for BMI[28, 29]. Significant associations between CM with CRP were reported in three  
193 studies. In a study comparing 79 participants with personality disorder and 55 healthy controls  
194 Fanning et al demonstrated a significant association between abuse and CRP, as measured  
195 retrospectively using the CTQ, but not neglect, in a bivariate correlation which did not adjust for  
196 covariates[30]. In a sample of 96 participants with first episode psychosis and 99 healthy controls,  
197 Hepgul *et al* found a trend towards elevated CRP in patients who had experienced CM, but this only  
198 reached statistical significance when participants were grouped by exposure to sexual abuse and,  
199 again, did not adjust for covariates[31]. In a study of 209 participants with  
200 schizophrenia/schizoaffective disorder, bipolar affective disorder and healthy controls, Quide et al  
201 demonstrated a significant association between sexual abuse and elevated CRP in schizophrenia  
202 patients only[32]. No other associations of CRP with other abuse sub-types or in different clinical  
203 groups was demonstrated. The analysis adjusted for age, gender, disease severity, and medication  
204 use, but did not adjust for BMI.

205 Of 20 studies examining the association between CM and CRP in non-clinical samples, 16 were  
206 retrospective and four prospective. The four prospective studies found significant associations  
207 between CM and elevated CRP. In a prospective twin study, Baldwin et al reported an association  
208 between CM and elevated CRP at age 18[33]. On stratified analysis this effect was significant in  
209 females only and remained significant after adjusting for covariates including waist-hip ratio. Osborn  
210 et al reported on the association between retrospective and prospective measures of CM with  
211 CRP[34]. They found that CRP was associated with prospective measures of abuse only. Of note  
212 their analysis adjusted for age, sex, ethnicity, parental occupation, heavy drinking, smoking, and  
213 depression but did not adjust for BMI. Danese et al reported on a large prospective cohort in New  
214 Zealand that measured CM using a combination of prospective and retrospective reports[9]. They  
215 demonstrated a significant association between CM and CRP which remained significant in  
216 extensively adjusted models, including adjustments for adult health behaviours and obesity. They  
217 estimated that 10% of low-grade inflammation as measured by CRP may be independently  
218 attributable to CM. Nikulina et al report a US cohort exposed to court substantiated neglect and



219 controls matched for age, sex, ethnicity, and socioeconomic status. In a model adjusting for BMI there  
220 was no significant association between neglect and CRP in the total sample, however the study did  
221 identify a significant interaction with race (authors' terminology)- wherein neglect was associated with  
222 elevated CRP in white participants only[35]. Their analysis considered family poverty as a covariate in  
223 this analysis, but it did not reach significance threshold for inclusion in the final model.

224 Of the 16 retrospective studies in non-clinical samples, nine studies found no significant association  
225 between child maltreatment and CRP[36-44]. A further 4 found initially significant associations which  
226 attenuated to non-significance on adjustment for BMI[45-48]. Finy et al report a study of 214 pregnant  
227 women (of whom 51.4% were overweight or obese) in which they reported small but statistically  
228 significant associations of CTQ score with CRP[19]. Through structural equation modelling, this  
229 association was found to be indirect and mediated by elevated BMI. Similarly, Matthews et al in a  
230 middle-aged female sample, found that sexual abuse, physical neglect and total number of abuse  
231 types were associated with elevated CRP in a relationship mediated by elevated BMI. They also  
232 found that emotional abuse and neglect were independently associated with elevated CRP[20].

233 Schrepf and colleagues, in a study of 687 participants in the MIDUS-II biomarker project found that  
234 CM was significantly associated with elevated CRP in adulthood in a relationship that was mediated  
235 by elevated BMI. They found that this relationship was mediated by a latent distress measure which  
236 was associated with using food as a coping mechanism. The association between BMI and CRP was  
237 stronger in females than males[49].

238 To summarise an association between CM and later elevation of CRP was demonstrated in four  
239 prospective studies in non-clinical samples, which adjusted for relevant covariates (however one did  
240 not adjust for BMI). Most retrospective studies (13/16) found either no association of CRP with BMI or  
241 an association which attenuated to non-significance on adjustment for BMI or other obesity measures.  
242 Three studies found a significant association of CM with CRP, all of which found that this to be  
243 mediated by elevated BMI.

## 244 **Interleukin-6**

245 The association between CM and II-6 was reported in 25 papers, 15 of which were based on clinical  
246 samples. Details of included papers are shown in tables 2a and 2b. All papers utilised retrospective  
247 measures of CM. Nineteen papers used CTQ to measure CM.

248

**Table 2a- Studies reporting interleukin-6: Clinical populations**

| Author                 | Sample Characteristics                                                                                                                                  | Sample Size | Sample Demographics                                                                                                                                                                                                                                                | Maltreatment Measure                                                     | CCAT Score | Main Findings                                                                                                                                                                                                                    |
|------------------------|---------------------------------------------------------------------------------------------------------------------------------------------------------|-------------|--------------------------------------------------------------------------------------------------------------------------------------------------------------------------------------------------------------------------------------------------------------------|--------------------------------------------------------------------------|------------|----------------------------------------------------------------------------------------------------------------------------------------------------------------------------------------------------------------------------------|
| Corsi-Zuelli 2020 [50] | Participants in the STREAM Cohort of patients with first episode psychosis, unaffected siblings, and healthy controls in Sao Paulo Brazil.              | 422         | <u>FEP:</u><br>Age= 30.8 (12.5)<br>Female= 37%<br><br><u>Siblings:</u><br>Age= 30.7 (10.5)<br>Female= 68.4%<br><br><u>Controls:</u><br>Age= 31.3 (11)<br>Female= 48.6%                                                                                             | CTQ- subcomponents; dichotomised                                         | 35         | In analyses adjusted for age, gender, BMI, smoking, substance use, education, and relationship status, no significant association of interleukin-6 with any subcomponent of abuse or neglect.                                    |
| Counotte 2019 [24]     | Participants in a study of participants with psychotic disorders, ultra-high risk for psychosis, unaffected siblings, and controls, in the Netherlands. | 117         | <u>Psychosis</u><br>Age= 25.5 (23-30)<br>Male= 6 (15.8%)<br><br><u>UHR</u><br>Age= 24.0 (20-29)<br>Female= 6 (54.5%)<br><br><u>Siblings</u><br>Age= 25.5 (21.3- 30.0)<br>Female= 12 (41.4%)<br><br><u>Controls:</u><br>Age= 24.0 (21.0-26.0)<br>Female= 21 (53.8%) | CTQ- total; dichotomised                                                 | 38         | No significant effect on CTQ on any inflammatory marker in models which adjust for age, sex, BMI, smoking, drug use, and education.                                                                                              |
| Dennison 2012 [54]     | Patients with schizophrenia in Cork Ireland recruited from outpatient and inpatient settings. Controls recruited from local university.                 | 80          | <u>Schizophrenia</u><br>Age= 38.33 (1.7)<br>Female= 16 (40%)<br><br><u>Controls:</u><br>Age= 36.2 (1.76)<br>Female= 27 (67.5%)                                                                                                                                     | CTQ- total; dichotomised                                                 | 31         | Higher levels of Il-6 in patients with schizophrenia who reported exposure to CM compared to patients with schizophrenia who did not report maltreatment and healthy controls, in an analysis that did not adjust for covariates |
| Fanning 2015 [30]      | Community recruited participants with and without personality disorder in a larger study about the correlates of impulsive aggression in Chicago USA    | 134         | <u>Personality Disorder</u><br>Age= 36.0 (7.7)<br>Female= 38 (48.1%)<br><br><u>Control:</u><br>Age- 31.9 (9.2)<br>Female= 30 (54.5%)                                                                                                                               | CTQ- separated to abuse and neglect sub-components; continuous analysis. | 30         | No association of abuse or neglect with Il-6 in an unadjusted analysis.                                                                                                                                                          |

|                            |                                                                                                                                                                                                                                                                                 |                             |                                                                                                                                                                                                |                                            |    |                                                                                                                                                                                                                                                                              |
|----------------------------|---------------------------------------------------------------------------------------------------------------------------------------------------------------------------------------------------------------------------------------------------------------------------------|-----------------------------|------------------------------------------------------------------------------------------------------------------------------------------------------------------------------------------------|--------------------------------------------|----|------------------------------------------------------------------------------------------------------------------------------------------------------------------------------------------------------------------------------------------------------------------------------|
| Grosse 2016 [55]           | Participants in the MOODINFLAME study of inflammatory biomarkers in MDD. Participants were inpatients with MDD in hospitals in Munster Germany. Participants were free from other mental illness or significant physical illnesses. Controls were recruited from the community. | 394                         | <u>MDD:</u><br>Age= 41 (12)<br>Female= 120 (56%)<br><br><u>Control:</u><br>Age= 36 (12)<br>Female= 114 (63%)                                                                                   | CTQ- total and subcomponents; dichotomised | 30 | No association of CM with Il-6 in a model adjusting for age, gender, waist hip ratio, and smoking.                                                                                                                                                                           |
| Imai 2008 [25]             | Female outpatients with PTSD and matching controls in Japan. Participants had no significant physical illnesses. Analysis of inflammation and abuse only included the PTSD group.                                                                                               | 40 (participants with PTSD) | Age= 38.3 (10.1)<br>Female= 100%                                                                                                                                                               | CTQ- total; continuous                     | 37 | No correlation of CTQ (total or subscales) with any inflammatory marker in unadjusted analysis.                                                                                                                                                                              |
| Lu 2013 [53]               | Study of outpatients with MDD (with and without history of childhood maltreatment) and controls recruited from Changsha China. Participants had no other mental or physical illnesses.                                                                                          | 65                          | <u>MDD and CM:</u><br>Age= 30.2 (8.53)<br>Female= 14 (63.6%)<br><br><u>MDD no CM:</u><br>Age= 30.1 (6.81)<br>Female= 11 (52.3%)<br><br><u>Control:</u><br>Age= 27.7 (4.78)<br>Female= 11 (50%) | CTQ- total; dichotomised                   | 24 | No correlation of CTQ with any cytokine in MDD and CM group in an unadjusted analysis.                                                                                                                                                                                       |
| Pedrotti Moreira 2018 [56] | Cross-sectional study of participants with MDD in Pelotas Brazil. Participants had no other mental or physical illness.                                                                                                                                                         | 166                         | Age= 25.87 (5.25)<br>Female= 124 (74.7%)                                                                                                                                                       | CTQ- total; continuous                     | 34 | In depressed participants CM was associated with elevated Il-6. This remained significant on linear regression adjusting for schooling and smoking status.                                                                                                                   |
| Muller 2019 [57]           | Inpatient and outpatients with MDD and matching controls (from local university) recruited in Munich Germany. No other mental or physical illnesses.                                                                                                                            | 88                          | <u>MDD</u><br>Age= 39.2 (12)<br>Female= 17 (39%)<br><br><u>Control</u><br>Age= 38.9 (11.8)<br>Female= 17 (39%)                                                                                 | CTQ- subcomponents; continuous             | 35 | In total sample Il-6 was positively correlated with Sexual abuse and physical neglect sub-components only. In the control group no sub-components correlated with Il-6.. In MDD group physical neglect correlated with Il-6 only. Analyses were not adjusted for covariates. |
| Munjiza 2018 [58]          | Inpatients with depression and matching controls in Belgrade Serbia.                                                                                                                                                                                                            | 117                         | <u>MDD</u><br>Age= 45.98 (10.31)<br>Female= 51 (80.0%)<br><br><u>Control</u><br>Age= 46.04 (10.15)<br>Female= 43 (81.1%)                                                                       | CTQ- total and subcomponents; continuous   | 30 | In the patient group only, Il-6 was positively correlated with total CTQ and PN, EA, and PA sub-components. Il-6 was not correlated with any CTQ component in controls. Analyses were not adjusted for covariates.                                                           |
| Palmos 2019 [26]           | Participants retrieved from 2 studies. Controls recruited from SeLCoH study of mental and physical health in the general population in London. MDD participants recruited from the control arm of the ADD                                                                       | 465                         | <u>MDD:</u><br>Age= 48.50 (16.14)<br>Female= 79 (48.1%)<br><br><u>Control</u>                                                                                                                  | CTQ- total; dichotomised                   | 37 | No significant association of CM with Il-6 in models adjusted for age, gender, ethnicity, smoking and BMI.                                                                                                                                                                   |

|                     |                                                                                                                                                                                                                                                                                                                       |     |                                                                                                                                                                                                                                                                                           |                                |    |                                                                                                                                                                                                                                        |
|---------------------|-----------------------------------------------------------------------------------------------------------------------------------------------------------------------------------------------------------------------------------------------------------------------------------------------------------------------|-----|-------------------------------------------------------------------------------------------------------------------------------------------------------------------------------------------------------------------------------------------------------------------------------------------|--------------------------------|----|----------------------------------------------------------------------------------------------------------------------------------------------------------------------------------------------------------------------------------------|
|                     | trial of metyrapone in depression. Participants had no other mental or physical illnesses.                                                                                                                                                                                                                            |     | Age= 48.50 (16.14)<br>Female= 158 (52.5%)                                                                                                                                                                                                                                                 |                                |    |                                                                                                                                                                                                                                        |
| Porcu 2018 [51]     | Women aged 18-65 in Londrina Brazil. Participants were patient with unipolar or bipolar depression recruited from outpatient clinics, non-depressed smokers were recruited from smoking cessation clinics and non-smoking controls from hospital staff. Participants excluded if had other mental or physical illness | 159 | <u>Depressed Smokers:</u><br>Age= 46.07(10.58)<br>Female= 100%<br><br><u>Depressed Never-Smokers:</u><br>Age= 41.08 (13.61)<br>Female= 100%<br><br><u>Control Smokers:</u><br>Age= 43.54 (11.85)<br>Female=100%<br><br><u>Control never-smokers:</u><br>Age= 39.21 (13.19)<br>Female=100% | CTQ- subcomponents; continuous | 23 | No association of CM with Il-6 in unadjusted analysis.                                                                                                                                                                                 |
| De Punder 2018 [28] | Patients with depression were recruited from an affective disorders clinic and controls from public advertisements. Participants did not have other mental or physical illnesses. Neither patients or controls taking psychotropic medications. Study in Berlin Germany                                               | 86  | <u>MDD and MT</u><br>Age= 38.09 (11.36)<br>Female= 14 (60.1%)<br><br><u>MDD no MT</u><br>Age= 32.61 (11.74)<br>Female= 18 (85.7%)<br><br><u>Control and MT</u><br>Age= 38.09 (11.36)<br>Female= 14 (66.7%)<br><br><u>Control no MT:</u><br>Age= 33.9 (9.77)<br>Female= 13 (61.2%)         | ETI- Dichotomised              | 31 | Significant difference in Il-6 between groups which remained significant after adjusting for BMI and smoking. On post-hoc testing significant difference between MDD + ACE vs HC no ACE only. Analyses were unadjusted for covariates. |
| Quide 2019 [32]     | Participants were outpatients with schizophrenia/ schizoaffective disorder, bipolar disorder, and healthy controls from Australia. All aged 18-65 with no significant physical illnesses                                                                                                                              | 209 | <u>Schizophrenia:</u><br>Age= 41.78 (11.33)<br>Female= 29 (42.6%)<br><br><u>Bipolar Disorder:</u><br>Age= 38.11 (12.31)<br>Female= 46 (66.7%)<br><br><u>Control:</u><br>Age= 36.17 (11.57)<br>Female= 34 (47.2%)                                                                          | CTQ- Subcomponents; continuous | 35 | No association of CM with Il-6 in model adjusted for in a model adjusted for age, gender, symptom severity, and medication usage.                                                                                                      |
| Smith 2011 [52]     | Participants in a larger study of influence of genetics and environmental responses to stress in African Americans in Atlanta                                                                                                                                                                                         | 110 | Sample demographics not reported. States that groups were matched for age and gender.                                                                                                                                                                                                     | CTQ- Total; dichotomised       | 27 | Maltreatment was not associated with Il-6 in an unadjusted analysis.                                                                                                                                                                   |

|                                                                          |  |  |  |  |  |
|--------------------------------------------------------------------------|--|--|--|--|--|
| Georgia. Participants grouped by presence of PTSD and early maltreatment |  |  |  |  |  |
| Also describe "extended sample" of 177-unclear origin                    |  |  |  |  |  |

**Table 2b Samples reporting interleukin-6: Non-clinical populations**

| Author                      | Sample Characteristics                                                                                                                                                                                         | Sample Size   | Sample Demographics                                                                                                        | Maltreatment Measure                                                                                       | CCAT Score | Main Findings                                                                                                                                                                                                          |
|-----------------------------|----------------------------------------------------------------------------------------------------------------------------------------------------------------------------------------------------------------|---------------|----------------------------------------------------------------------------------------------------------------------------|------------------------------------------------------------------------------------------------------------|------------|------------------------------------------------------------------------------------------------------------------------------------------------------------------------------------------------------------------------|
| Bertone-Johnstone 2012 [47] | Participants in Nurses Health Study II. A cohort of female nurses in USA recruited in 1989. A sub-sample was invited to provide blood samples between 1996-1999.                                               | 702.          | Age= 48.9 (SD not reported)<br>Female= 100%                                                                                | Physical abuse- Adapted Revised Conflict Tactics Scale.<br>Sexual abuse- Adapted Sexual Experiences Survey | 33         | Il-6 was associated with adolescent PA and SA but both because non-significant in models adjusting for BMI.                                                                                                            |
| Davis 2019 [59]             | Participants in a study of healthy aging in Arizona USA.                                                                                                                                                       | 770.          | Age= 53.5 (7.24)<br>Female= 423 (55%)                                                                                      | CTQ- 10 item short version excluding neglect items; continuous                                             | 34         | CM was associated with elevated Il-6 in a model adjusted for age, gender, ethnicity, education, smoking, alcohol use, sleep disturbance, and physical activity levels but not BMI.                                     |
| Finy 2018 [19]              | Pregnant woman recruited in Ohio USA. Participants were physically healthy.                                                                                                                                    | 214           | Age= 29.38 (4.93)<br>Female= 100%                                                                                          | CTQ- subscales of physical abuse, sexual abuse, and emotional abuse; continuous                            | 35         | CTQ score was positively correlated Il-6 in an unadjusted analysis..<br>In structural equation models CM had no effect on Il-6.                                                                                        |
| Gouin 2012 [39]             | Participants in a study of stress in older adult dementia caregivers in Canada. Participants excluded if had illnesses which affect immune system, or BMI >40.                                                 | 130           | <u>Abused</u><br>Age= 62.47 (12.07)<br>Female= 46 (80.7%)<br><br><u>Non-Abused</u><br>Age= 67.2 (13.74)<br>Sex= 61 (83.5%) | CTQ- total (excluding physical neglect); dichotomised                                                      | 35         | Abuse was associated with elevated Il-6 in a model adjusting for age, sex, ethnicity, education, BMI, marital status, sleep disturbance, and caregiving status.                                                        |
| Hartwell 2013 [40]          | Control group in a larger study on gender differences in stress responses in cocaine dependency in South Carolina USA. Participants were non-cocaine using controls with no mental or physical illnesses.      | 39            | Age= 35.69 (12.0)<br>Female= 20 (51.3%)                                                                                    | ETI- Number of traumas                                                                                     | 36         | Number of traumas was significantly associated with elevated Il-6, in models adjusted for age, sex, and smoking status but not BMI.<br>In analysis of subscales general trauma only was associated with elevated Il-6. |
| Kiecolt-Glaser 2011 [60]    | Participants in a study of caregiving stress in older adults including caregivers for a spouse or parent with dementia and matching controls, in Ohio USA. Participants had no immune-related health problems. | 132           | Age= 69.7 (10.14)<br>Female= 95 (72%)                                                                                      | CTQ total (excluding physical neglect); dichotomised                                                       | 36         | Abuse was associated with increased Il-6 in a model adjusted for age, sex, BMI, marital status, and caregiver status.                                                                                                  |
| Pinto Pereira 2019 [45]     | 1) 1958 British Birth Cohort: A longitudinal cohort of all born in one                                                                                                                                         | British Birth | <u>British Birth Cohort:</u><br>Age= 45.2 (44.3-46.0)<br>(mean and range)                                                  | Physical, emotional and sexual abuse; emotional neglect and physical                                       | 25         | No form of maltreatment was associated with differences in Il-6 in models adjusted for age, gender, ethnicity, socioeconomic status, and BMI or waist hip ratio.                                                       |

|                    |                                                                                                                                                                                                                                              |                                 |                                                                                                                                                                        |                                                                                                                                                                 |    |                                                                                                                                                                                                   |
|--------------------|----------------------------------------------------------------------------------------------------------------------------------------------------------------------------------------------------------------------------------------------|---------------------------------|------------------------------------------------------------------------------------------------------------------------------------------------------------------------|-----------------------------------------------------------------------------------------------------------------------------------------------------------------|----|---------------------------------------------------------------------------------------------------------------------------------------------------------------------------------------------------|
|                    | week in 1958. Bloods collected at visit age 45.<br>2) Midlife in United States (MIDUS): Cohort of adults 25-75 in USA recruited in 1994-1995. 2 <sup>nd</sup> wave of data collection (MIDUS-II) followed up original sample 10 years later. | Cohort= 7661<br><br>MIDUS= 1255 | Female= 3828 (50%)<br><br><u>MIDUS</u><br>Age<br>- Male= 57.9 (36-86)<br>- Female= 56.9 (35-86)<br><br>Female= 713 (56.8%)                                             | neglect (British Birth Cohort only). Derived from study questions. All measures retrospective except from prospective record of neglect in British Birth Cohort |    |                                                                                                                                                                                                   |
| Rooks 2012 [48]    | Male middle aged twins born between 1946-1956 from the Vietnam Era Twin Registry in USA.                                                                                                                                                     | 482                             | Age= 55(3)<br>Female= 0                                                                                                                                                | ETI- total; continuous                                                                                                                                          | 32 | CM was not associated with Il-6 in unadjusted analysis or model adjusted for age, income, education, behavioural factors, cardiovascular risk factors (including BMI), and psychiatric diagnoses. |
| Slopen 2010 [46]   | Participants in MIDUS cohort in USA                                                                                                                                                                                                          | 999                             | <u>White Participants (n=822):</u><br>Age= 58.66 (11.65)<br>Female= 52.8%<br><br><u>African-American Participants (n=177):</u><br>Age= 54.15 (10.71)<br>Female= 67.23% | No formal tool. Physical, emotional and sexual abuse derived from study questions. All measures retrospective.                                                  | 33 | CM was not associated with Il-6 in model adjusted for age, gender, ethnicity, cardiovascular disease, and BMI..                                                                                   |
| Thurston 2017 [44] | Participants in the MsHeart study of peri- and post-menopausal women aged 40-60 in Pittsburgh USA. Excluded if history of significant physical illness                                                                                       | 286                             | <u>Abuse/Neglect (n=132)</u><br>Age= 53.68 (4.11)<br>Female= 100%<br><br><u>No abuse/neglect (n=163):</u><br>Age= 54.28 (3.90)<br>Female= 100%                         | CTQ- total and subcomponents; dichotomised                                                                                                                      | 29 | No difference in Il-6 between CM group and controls in unadjusted analysis.                                                                                                                       |

**Table 2 Legend:** BMI- Body mass index, CM- Child Maltreatment, CTQ- Childhood Trauma Questionnaire, EA- Emotional abuse, EN- Emotional neglect, ETI- Early Trauma Inventory, Il-6- Interleukin-6, MDD- Major depressive disorder, PA- Physical abuse, PN- Physical abuse, SA- Sexual abuse.

249 Of the clinical samples, nine papers did not identify a significant association between CM and Il-6[24-  
250 26, 30, 32, 50-53]. Dennison et al reported higher levels of Il-6 in patients with schizophrenia who  
251 reported exposure to CM compared to patients with schizophrenia who did not report maltreatment  
252 and healthy controls, in an analysis that did not adjust for covariates[54]. Grosse et al reported on 394  
253 patients and controls in the MOODINFLAME study of inflammatory markers in Major Depressive  
254 Disorder (MDD)[55]. There was no association between CM and Il-6 in the total sample, nor in the  
255 MDD or control groups. In an analysis limited to MDD patients exposed to CM, sexual abuse was  
256 associated with elevated Il-6 in an analysis that adjusted for age, gender, smoking, and waist-hip  
257 ratio. Pedrotti Moreira et al reported on a cross-sectional study of MDD and healthy control  
258 participants in Brazil[56]. They identified a significant association between CM and higher Il-6 in  
259 participants with MDD only, in an analysis which adjusted for education and smoking status but not  
260 BMI. Muller et al examined the correlation between CTQ scores and inflammatory markers in a  
261 sample consisting of patients with MDD and healthy controls[57]. They found a small but significant  
262 correlation between sexual abuse and physical neglect with Il-6 in an unadjusted analysis. Munjiza  
263 reported that Il-6 was positively correlated with total CTQ, physical neglect, emotional abuse, and  
264 physical abuse in an unadjusted analysis limited to participants with MDD only[58]. De Punder et al  
265 reported on a sample of patients with MDD and healthy controls[28]. They grouped participants by  
266 presence of MDD and exposure to CM and identified a significant between group difference in an  
267 analysis which adjusted for BMI and smoking. On post-hoc testing the only significant difference was  
268 between the MDD and CM group vs healthy control and no CM, thus this analysis does not clearly  
269 distinguish the effects of MDD from CM.

270 Ten studies reported on non-clinical samples. Three of these found no association between CM and  
271 Il-6[45, 48]; a further three studies found associations of CM with elevated Il-6 which attenuated to  
272 non-significance after adjustment for BMI[19, 44, 46, 47]. Davis et al, in a study of healthy middle  
273 aged adults in the USA, found that CM was significantly associated with elevated Il-6 in a model that  
274 adjusted for age, gender, ethnicity, and health behaviours, but not BMI[59]. Gouin et al, in a study of  
275 care-giver stress in older adults found a significant association between CM and Il-6 in a model which  
276 adjusted for age, sex, ethnicity, education, BMI and social factors[39]. Hartwell *et al* reported a  
277 significant association between the number of traumas as measured by the ETI and elevated Il-6 in a  
278 model which adjusted for age, sex, and smoking status but not BMI[40]. In another study of care-giver



279 stress in older adults, Kiecolt-Glaser identified a significant association between CM and elevated IL-6  
280 in a model adjusted for age, sex, BMI and social factors[60].

281 In summary most studies did not find a significant association between CM and elevated IL-6. Studies  
282 reporting positive findings tended not to adjust for BMI and in some papers positive associations were  
283 limited to sub-groups. Notably, two studies that adjusted appropriately for covariates found significant  
284 associations between CM and elevated IL-6 in older adults.

## 285 **Tumour necrosis factor-alpha**

286 The association between CM with TNF- $\alpha$  was reported in 16 papers, 13 of which were in clinical  
287 samples. All studies were retrospective and 14 used the CTQ to measure CM. Details of included  
288 papers are shown in tables 3a and 3b.

289

**Table 3a- Studies reporting TNF-a: Clinical populations**

| Author                 | Sample Characteristics                                                                                                                                                                                                                                                          | Sample Size | Sample Demographics                                                                                                                                                                                                                                                                          | Maltreatment Measure                       | CCAT Score | Main Findings                                                                                                                                                                                                                                                                                                  |
|------------------------|---------------------------------------------------------------------------------------------------------------------------------------------------------------------------------------------------------------------------------------------------------------------------------|-------------|----------------------------------------------------------------------------------------------------------------------------------------------------------------------------------------------------------------------------------------------------------------------------------------------|--------------------------------------------|------------|----------------------------------------------------------------------------------------------------------------------------------------------------------------------------------------------------------------------------------------------------------------------------------------------------------------|
| Corsi-Zuelli 2020 [50] | Participants in the STREAM Cohort of patients with first episode psychosis, unaffected siblings, and healthy controls in Sao Paulo Brazil.                                                                                                                                      | 422         | <u>FEP:</u><br>Age= 30.8 (12.5)<br>Female= 37%<br><br><u>Siblings:</u><br>Age= 30.7 (10.5)<br>Female= 68.4%<br><br><u>Controls:</u><br>Age= 31.3 (11)<br>Female= 48.6%                                                                                                                       | CTQ- subcomponents; dichotomised           | 35         | In analyses adjusted for age, gender, BMI, smoking, substance use, education, and relationship status no significant association of TNF-a with any subcomponent of abuse or neglect.                                                                                                                           |
| Counotte 2019 [24]     | Participants in a study of participants with psychotic disorders, ultra-high risk for psychosis, unaffected siblings, and controls, in the Netherlands.                                                                                                                         | 117         | <u>Psychosis</u><br>Age= 25.5 (23-30)<br>Male= 6 (15.8%)<br><br><u>UHR</u><br>Age= 24.0 (20-29)<br>Female= 6 (54.5%)<br>BMI= 23.1 (18.5- 26.2)<br><br><u>Siblings</u><br>Age= 25.5 (21.3- 30.0)<br>Female= 12 (41.4%)<br><br><u>Controls:</u><br>Age= 24.0 (21.0-26.0)<br>Female= 21 (53.8%) | CTQ- dichotomised; total and subcomponents | 38         | No significant effect on CTQ on any inflammatory marker in models which adjust for age, sex, BMI, smoking, drug use, and education.                                                                                                                                                                            |
| Dennison 2012 [54]     | Patients with schizophrenia in Cork Ireland recruited from outpatient and inpatient settings. Controls recruited from local university.                                                                                                                                         | 80          | <u>Schizophrenia</u><br>Age= 38.33 (1.7)<br>Female= 16 (40%)<br><br><u>Controls:</u><br>Age= 36.2 (1.76)<br>Female= 27 (67.5%)                                                                                                                                                               | CTQ- total; dichotomised                   | 31         | Compared differences in cytokines across groups (schizophrenia with abuse, schizophrenia without abuse, and control) using ANOVA. Significant between group difference for TNF-a. Post-hoc testing showed significant differences between schizophrenia with and without abuse. Did not adjust for covariates. |
| Grosse 2016 [55]       | Participants in the MOODINFLAME study of inflammatory biomarkers in MDD. Participants were inpatients with MDD in hospitals in Munster Germany. Participants were free from other mental illness or significant physical illnesses. Controls were recruited from the community. | 394         | <u>MDD:</u><br>Age= 41 (12)<br>Female= 120 (56%)<br><br><u>Control:</u><br>Age= 36 (12)<br>Female= 114 (63%)                                                                                                                                                                                 | CTQ- total and subcomponents; dichotomised | 30         | No association of abuse with TNF-a in total sample or MDD or control groups.<br>In a subsample of MDD patient with a history of abuse there was a significant association of sexual abuse only with TNF-a which remained significant after adjusting for age, gender, waist hip ratio, and smoking.            |

|                            |                                                                                                                                                                                                                                                                                                      |                             |                                                                                                                                                                                                                  |                                                                               |      |                                                                                                                                                                                                                                                                                        |
|----------------------------|------------------------------------------------------------------------------------------------------------------------------------------------------------------------------------------------------------------------------------------------------------------------------------------------------|-----------------------------|------------------------------------------------------------------------------------------------------------------------------------------------------------------------------------------------------------------|-------------------------------------------------------------------------------|------|----------------------------------------------------------------------------------------------------------------------------------------------------------------------------------------------------------------------------------------------------------------------------------------|
| Imai 2008 [25]             | Female outpatients with PTSD and matching controls in Japan. Participants had no significant physical illnesses. Analysis of inflammation and abuse only included the PTSD group.                                                                                                                    | 40 (participants with PTSD) | Age= 38.3 (10.1)<br>Female= 100%                                                                                                                                                                                 | CTQ- total; continuous                                                        | . 37 | No correlation of CTQ (total or subscales) with any inflammatory marker in unadjusted analysis                                                                                                                                                                                         |
| Kraav 2019 [61]            | Sub-sample of the NeuroDep study of MDD in Kuopio Finland. All participants had MDD and had no other mental or physical illnesses.                                                                                                                                                                   | 78                          | <u>Physical Violence:</u><br>Age= 41.63 (9.7)<br>Female= 12 (50%)<br><br><u>Control:</u><br>Age= 37.24 (12.5)<br>Female= 30 (55.6)                                                                               | ACEs questionnaire. Due to low sample size only included physical abuse item. | 32   | TNF-a did not differ between groups in an unadjusted analysis.                                                                                                                                                                                                                         |
| Lu 2013 [53]               | Study of outpatients with MDD (with and without and history of childhood maltreatment) and controls recruited from Changsha China. Participants had no other mental or physical illnesses.                                                                                                           | 65                          | <u>MDD and CM:</u><br>Age= 30.2 (8.53)<br>Female= 14 (63.6%)<br><br><u>MDD no CM:</u><br>Age= 30.1 (6.81)<br>Female= 11 (52.3%)<br><br><u>Control:</u><br>Age= 27.7 (4.78)<br>Female= 11 (50%)                   | CTQ- total; dichotomised                                                      | 24   | No correlation of CTQ with TNF-a in any group, in an unadjusted analysis.                                                                                                                                                                                                              |
| Pedrotti Moreira 2018 [56] | Cross-sectional study of participants with MDD in Pelotas Brazil. Participants had no other mental or physical illness.                                                                                                                                                                              | 166                         | Age= 25.87 (5.25)<br>Female= 124 (74.7%)                                                                                                                                                                         | CTQ- total; continuous                                                        | 34   | There was no association of abuse and TNF-a in model adjusting for age, smoking status, and schooling.                                                                                                                                                                                 |
| Palmas 2019 [26]           | Participants retrieved from 2 studies. Controls recruited from SeLCoH study of mental and physical health in the general population in London. MDD participants recruited from the control arm of the ADD trial of metyrapone in depression. Participants had no other mental or physical illnesses. | 465                         | <u>MDD:</u><br>Age= 48.50 (16.14)<br>Female= 79 (48.1%)<br><br><u>Control</u><br>Age= 48.50 (16.14)<br>Female= 158 (52.5%)                                                                                       | CTQ total score; dichotomised                                                 | 37   | No significant association of CM with TNF-a in models adjusted for age, gender, ethnicity, smoking and BMI.                                                                                                                                                                            |
| Guidé 2019 [32]            | Participants were outpatients with schizophrenia/ schizoaffective disorder, bipolar disorder, and healthy controls from Australia. All aged 18-65 with no significant physical illnesses                                                                                                             | 209                         | <u>Schizophrenia:</u><br>Age= 41.78 (11.33)<br>Female= 29 (42.6%)<br><br><u>Bipolar Disorder:</u><br>Age= 38.11 (12.31)<br>Female= 46 (66.7%)<br><br><u>Control:</u><br>Age= 36.17 (11.57)<br>Female= 34 (47.2%) | CTQ- Sub-components; continuous                                               | 35   | No association of maltreatment with any inflammatory marker in control or bipolar group. In schizophrenia group significant association of sexual abuse and CRP in a model also significant for sex and anti-psychotic dose. No other significant associations in schizophrenia group. |
| Smith 2011 [52]            | Participants in a larger study of influence of genetics and environmental responses to stress in African Americans in Atlanta Georgia. Participants                                                                                                                                                  | 110                         | Sample demographics not reported. States that groups were matched for age and gender.                                                                                                                            | CTQ- Total; dichotomised                                                      | 27   | CM associated with TNF-a but no other inflammatory markers in an analysis adjusted for age, gender, socioeconomic status, mental health outcomes, but not BMI.                                                                                                                         |

|                    |                                                                 |     |                                                                                                                                                                                        |                                                                                                       |    |                                                                           |
|--------------------|-----------------------------------------------------------------|-----|----------------------------------------------------------------------------------------------------------------------------------------------------------------------------------------|-------------------------------------------------------------------------------------------------------|----|---------------------------------------------------------------------------|
|                    | grouped by presence of PTSD and early maltreatment              |     |                                                                                                                                                                                        |                                                                                                       |    |                                                                           |
| Toft 2018 [62]     | Patients with MDD admitted to a psychiatric hospital in Norway. | 128 | <u>Mild:</u><br>Age= 39.4 (10.8)<br>Female= 20 (71.4%)<br><br><u>Moderate</u><br>Age= 44.2 (12.0)<br>Female= 28 (66.7%)<br><br><u>Severe</u><br>Age= 41.3 (11.7)<br>Female= 44 (75.9%) | No formal measure. Asked about trauma on admission interview and grouped as trauma present or absent. | 27 | Trauma exposure associated with elevated TNF-a in an unadjusted analysis. |
| Zeugmann 2013 [27] | Inpatients with MDD in Germany.                                 | 25  | Age= 47.8 (15.02)<br>Female= 17 (68%)                                                                                                                                                  | CTQ- subcomponents; continuous                                                                        | 31 | No association of CM with TNF-a in an unadjusted analysis..               |

**Table 3b- Studies reporting TNF-a: Non-clinical populations**

| Author                   | Sample Characteristics                                                                                                                                                                                         | Sample Size                             | Sample Demographics                                                                                                        | Maltreatment Measure                                  | CCAT Score | Main Findings                                                                                                                                       |
|--------------------------|----------------------------------------------------------------------------------------------------------------------------------------------------------------------------------------------------------------|-----------------------------------------|----------------------------------------------------------------------------------------------------------------------------|-------------------------------------------------------|------------|-----------------------------------------------------------------------------------------------------------------------------------------------------|
| Gouin 2012 [39]          | Participants in a study of stress in older adult dementia caregivers in Canada. Participants excluded if had illnesses which affect immune system, or BMI >40.                                                 | 130<br><br>Abused= 57<br>Non-Abused= 73 | <u>Abused</u><br>Age= 62.47 (12.07)<br>Female= 46 (80.7%)<br><br><u>Non-Abused</u><br>Age= 67.2 (13.74)<br>Sex= 61 (83.5%) | CTQ- total (excluding physical neglect); dichotomised | 35         | No association of CM with TNF-in a model adjusted for age, sex, ethnicity, education, BMI, marital status, sleep disturbance and caregiving status. |
| Hartwell 2013 [40]       | Control group in a larger study on gender differences in stress responses in cocaine dependency in South Carolina USA. Participants were non-cocaine using controls with no mental or physical illnesses.      | 39                                      | Age= 35.69 (12.0)<br>Female= 20 (51.3%)                                                                                    | ETI- Number of traumas                                | 36         | Number of traumas was significantly associated with elevated TNF-a in models adjusted for age, sex, and smoking status, but not BMI.                |
| Kiecolt-Glaser 2011 [60] | Participants in a study of caregiving stress in older adults including caregivers for a spouse or parent with dementia and matching controls, in Ohio USA. Participants had no immune-related health problems. | 132                                     | Age= 69.7 (10.14)<br>Female= 95 (72%)                                                                                      | CTQ Total (excludes physical neglect); dichotomised   | 36         | CM was not associated with TNF-a, in a model adjusted for age, sex, BMI, marital status, and caregiver status.                                      |

Table 3 Legend: BMI- Body mass index, CM- Child Maltreatment, CTQ- Childhood Trauma Questionnaire, EA- Emotional abuse, EN- Emotional neglect, ETI- Early Trauma Inventory, MDD- Major depressive disorder, PA- Physical abuse, PN- Physical abuse, TNF-a- Tumour Necrosis Factor Alpha, SA- Sexual abuse.

290 Ten papers, all reporting clinical samples, did not identify a significant association between CM and  
291 TNF-a[24-27, 32, 50, 53, 55, 56, 61]. Dennison et al reported elevated levels of TNF-a in participants  
292 with schizophrenia and a history of CM compared to participants with schizophrenia only, in an  
293 analysis which did not adjust for covariates[54]. Smith et al reported that TNF-a was associated with  
294 elevated TNF-a in a sample of 110 African-Americans with and without PTSD, in an analysis which  
295 adjusted for age, gender, education, substance use, mental health factors, but not BMI. Toft et al, in a  
296 sample of 128 inpatients with MDD, found a significant association between CM (which was not  
297 measured using a formal tool) and elevated TNF-a in an unadjusted analysis[62].

298 In non-clinical samples, two studies did not find a significant association between CM and TNF-a[39,  
299 60]. Hartwell et al in a study of 39 healthy adults in the USA, reported a significant association  
300 between the number of traumas on the ETI and elevated TNF-a in an analysis which adjusted for age,  
301 sex, and smoking status but not BMI[40].

302 To summarise most studies did not find a significant association between CM and elevated TNF-a,  
303 and none of the studies reporting significant associations had adjusted for BMI.

304

## 305 **Discussion**

306 This systematic review examining the association between CM and markers of systemic inflammation  
307 has identified significant variation in the conduct and statistical analysis of studies in this area to the  
308 extent that quantitative synthesis of the findings would be invalid. Of note, there was wide variation in  
309 how CM exposure was recorded and analysed; for example as a dichotomous versus a continuous  
310 variable; as an overall construct versus its subcomponents. Furthermore, the method of analysis  
311 varied widely, including between group comparisons, bivariate correlations, linear regression, and  
312 more complex modelling. Of note, in analyses where adjustment for covariates was possible there  
313 was no consistency in which variables were included. Unsurprisingly, in this context, the findings of  
314 studies in this field are inconsistent: the majority of retrospective studies showed no association  
315 between CM and inflammatory markers; a number of unadjusted analyses showed statistically  
316 significant associations,, and a smaller number of fully adjusted analyses showed statistically

317 significant associations but with generally small effect sizes. The variation in conduct and analysis of  
318 studies makes it challenging to integrate these disparate findings into a cohesive whole.

319

320 This review highlights several limitations in the existing literature. Only four studies (less than 10%)  
321 included prospective measures of CM, and these studies only related to CRP. All four of these studies  
322 found a significant association between CM and elevated CRP later in life, and two highlighted  
323 significant interactions with ethnicity or gender. Baldwin et al have highlighted that retrospective and  
324 prospective measures of CM tend to capture different groups of individuals and are not clearly  
325 measuring the same construct[63]. This is further supported by the findings of Osborn and colleagues  
326 who found that prospective but not retrospective measures of CM were associated with elevated  
327 CRP[34]. Despite this small prospective evidence base, and its narrow focus on CRP, the existence  
328 of these appropriately adjusted prospective studies demonstrating an association between CM and  
329 later increases in CRP suggests that further examination of the links between CM and inflammation is  
330 still warranted, but only if studies have sufficient methodological rigour.

331 In the research base as a whole, studies were inconsistent in their construct of CM: an overall “CM”  
332 construct versus sub-types of maltreatment; as a dichotomous variable treating CM as present or  
333 absent, or as a continuous measure of the severity of CM. Statistical properties of the way the  
334 construct of CM is presented and analysed may contribute to important differences in results (e.g.  
335 analyses of continuous measures have more statistical power than dichotomous variables). Studies  
336 were also inconsistent in their reporting and analysis of sub-types of abuse. Studies describing results  
337 for individual sub-types of CM have reported different effects for different types of maltreatment (most  
338 commonly stronger associations of sexual abuse with inflammation)[29, 31, 32, 47, 55]. An approach  
339 based on individual sub-types of maltreatment may, however, neglect the inherent complexity and  
340 clustering of adversities. For example rather than a specific effect of child sexual abuse as opposed to  
341 other maltreatment, the associations found between sexual abuse and inflammation may be more  
342 reflective of sexual abuse exposure indexing an overall greater severity of maltreatment exposure and  
343 a clustering of multiple adversities[64, 65]. There were limited data on the timing and duration of CM  
344 which limits the ability to draw conclusions about sensitive periods in the development of the immune

345 system. Overall, the inconsistencies in measurement of CM could be masking potentially important  
346 findings, especially regarding mechanisms.

347 The conceptualisation and measurement of CM and ACEs more broadly is an area of ongoing debate  
348 with relevance to study methodology in this area. Total scores based on the number of forms of CM or  
349 ACEs a person has been exposed to is a straight forward way of conceptualising and measuring CM,  
350 however it does not reflect the fact that categories of CM or ACE are not equal in their severity or  
351 impacts[64]. Analyses based on specific exposures to sub-types of CM or ACE can reflect differential  
352 severity and impacts of different types of maltreatment, but fail to reflect the common clustering of  
353 maltreatment types (for example intra-familial sexual abuse will almost always be association with  
354 physical abuse, emotional abuse, and neglect), and can lose this inherent complexity[64]. Recent  
355 work using latent class analysis has identified common clusters of adversity which may represent a  
356 better way of conceptualising this area moving forwards[65, 66]. Furthermore it is important to  
357 recognise and account for wider forms of adversity which are not fully reflect in traditional conceptions  
358 of CM and ACE (which focus more on the immediate family environment), in particular socioeconomic  
359 status and wider social adversities such as discrimination[66, 67]. In a similar vein,  
360 neurodevelopmental conditions are related to risk of exposure to CM[68] but were not considered as  
361 covariates in any of the included studies.

362 Studies varied greatly in their accounting for potential confounding and mediating variables. Of note,  
363 BMI appears to have an important role in the relationship between CM, systemic inflammation and  
364 psychopathology. As highlighted previously, most studies finding significant associations between CM  
365 and systemic inflammation did not adjust for BMI or related measures (e.g. waist-hip ratio), yet studies  
366 employing structural equation modelling suggested that the relationship between CM and  
367 inflammation might be mediated by BMI. Based on the current literature it is plausible to speculate  
368 that the association between CM and systemic inflammation might be primarily mediated by elevated  
369 BMI, but further direct data on this possible association are required.

370 Most studies were based in Europe or North America and predominantly included participants of white  
371 ethnicity. Two studies[35, 46] found significant interactions with ethnicity, contrastingly finding a  
372 relationship between neglect and CRP in people of white ethnicity only[35]; and Il-6, fibrinogen, E-  
373 Selectin, and sICAM for African-Americans only[46]. Associations between race and health outcomes  
374 (particularly in the USA, where there are strong associations between ethnicity and poverty and poor



375 access to healthcare) are likely to be confounded by a range of social and environmental factors[67],  
376 and it would be helpful for these apparent associations to be explored more widely and in other  
377 settings.

378 One study[33] found a significant relationship between CM and CRP for females only. Other studies  
379 did not directly examine the role of gender, however many studies were conducted exclusively in  
380 females or in predominantly female samples which may further affect the overall results. There did not  
381 appear to be a consist difference in effects observed in studies limited to participants with psychiatric  
382 diagnosis as compared to those limited to community volunteers.

383

384 This systematic review is subject to several limitations. Whilst attempts were made to be exhaustive,  
385 practical limitations precluded inclusion of foreign language titles and grey literature. Whilst attempting  
386 to focus on studies where CM was predominantly child abuse or neglect, limitations in how abuse was  
387 measured has meant that some included studies also include broader domains of childhood trauma  
388 such as bullying and parental separation. The original protocol for this study aimed to perform a meta-  
389 analysis but this was unfortunately neither practicable nor appropriate due to i. significant variation in  
390 the exposure concept (CM as a dichotomous or continuous variable; as an overall construct or as  
391 sub-components), ii. the use of measurement tools (in particular, difficulties combining between-  
392 group comparisons and linear analyses), and iii. inconsistencies in adjustment for covariates where  
393 this was done at all. These problems would have significantly impacted the statistical robustness of  
394 any findings and potentially created more confusion or, worse, amplified biases, in this already  
395 challenging field.

396

397 Overall this systematic review has identified an association between CM and elevated CRP in  
398 prospective studies, however findings of retrospective studies and for other biomarkers are conflicting.  
399 Tentatively at least part of the association between CM and systemic inflammation may be mediated  
400 by the association of CM and elevated BMI, which itself may be driven by physiological (such as  
401 dysregulated stress-reactivity leading to dysregulation of metabolic pathways) or psychological (such  
402 as emotional dysregulation or impulsivity leading to dysregulated eating behaviours) factors, or indeed  
403 both. Obesity is strongly associated with low-grade inflammation in a mechanism which may be

404 partially mediated by alterations in the gut microbiome and gut permeability[69], factors which have  
405 also been suggested as important drivers of low-grade inflammation and age-related disease[70].  
406 Additional previously unmeasured covariates may also mediate the association of CM with elevated  
407 BMI and inflammation, for example neurodevelopmental disorders (which previous work by our group  
408 has shown to be associated with obesity[71]) and the gut microbiome, which may mediate the  
409 relationship between a range of adverse exposure and inflammation[70]. All of this highlights the  
410 importance of applying complex systems methodologies to exploring the interaction of variables  
411 holistically and longitudinally[72].

412 Achieving the research goal of understanding these potentially complex mechanisms would have  
413 practical relevance since, if the main mediator is obesity or the gut microbiome, the most effective  
414 interventions would likely involve weight loss, exercise, dietary change and early intervention to  
415 prevent obesity; whereas if the association between CM and systemic inflammation were more direct,  
416 this may point towards a role for anti-inflammatory medications. Further prospective, longitudinal,  
417 research using robust and comparable measures of CM with careful consideration of confounding and  
418 mediating variables, particularly BMI, are required to bring clarity to this field.

419

## **References**

- 421 1. Gilbert R, Widom CS, Browne K, Fergusson D, Webb E, Janson S. Burden and  
422 consequences of child maltreatment in high-income countries. *The Lancet*. 2009;373(9657):68-81.
- 423 2. Nemeroff CB. *Paradise Lost: The Neurobiological and Clinical Consequences of Child Abuse*  
424 *and Neglect*. *Neuron*. 2016;89(5):892-909. doi: <http://dx.doi.org/10.1016/j.neuron.2016.01.019>.
- 425 3. Hughes K, Bellis MA, Hardcastle KA, Sethi D, Butchart A, Mikton C, et al. The effect of  
426 multiple adverse childhood experiences on health: a systematic review and meta-analysis. *Lancet*  
427 *Public Health*. 2017;2(8):e356-e66. Epub 2017/07/31. doi: 10.1016/S2468-2667(17)30118-4. PubMed  
428 PMID: 29253477.
- 429 4. Anda RF, Fleisher VI, Felitti VJ, Edwards VJ, Whitfield CL, Dube SR, et al. Childhood Abuse,  
430 Household Dysfunction, and Indicators of Impaired Adult Worker Performance. *Perm J*. 2004;8(1):30-  
431 8. doi: 10.7812/tpp/03-089. PubMed PMID: 26704603; PubMed Central PMCID: PMCPMC4690705.
- 432 5. Felitti VJ, Anda RF, Nordenberg D, Williamson DF, Spitz AM, Edwards V, et al. Relationship  
433 of childhood abuse and household dysfunction to many of the leading causes of death in adults. The  
434 Adverse Childhood Experiences (ACE) Study. *Am J Prev Med*. 1998;14(4):245-58. doi:  
435 10.1016/s0749-3797(98)00017-8. PubMed PMID: 9635069.
- 436 6. Dube SR, Felitti VJ, Dong M, Giles WH, Anda RF. The impact of adverse childhood  
437 experiences on health problems: Evidence from four birth cohorts dating back to 1900. *Preventive*  
438 *Medicine: An International Journal Devoted to Practice and Theory*. 2003;37(3):268-77. doi:  
439 10.1016/S0091-7435(03)00123-3. PubMed PMID: 2003-07279-010.
- 440 7. Danese A, Baldwin JR. Hidden Wounds? Inflammatory Links Between Childhood Trauma and  
441 Psychopathology. *Annual review of psychology*. 2017;68:517-44. doi:  
442 <http://dx.doi.org/10.1146/annurev-psych-010416-044208>.
- 443 8. Speer K, Upton D, Semple S, McKune A. Systemic low-grade inflammation in post-traumatic  
444 stress disorder: a systematic review. *J Inflamm Res*. 2018;11:111-21. Epub 2018/03/22. doi:  
445 10.2147/JIR.S155903. PubMed PMID: 29606885; PubMed Central PMCID: PMCPMC5868606.
- 446 9. Danese A, Pariante CM, Caspi A, Taylor A, Poulton R. Childhood maltreatment predicts adult  
447 inflammation in a life-course study. *Proceedings of the National Academy of Sciences of the United*  
448 *States of America*. 2007;104(4):1319-24. doi: <http://dx.doi.org/10.1073/pnas.0610362104>.
- 449 10. Sarwar N, Butterworth AS, Freitag DF, Gregson J, Willeit P, Gorman DN, et al. Interleukin-6  
450 receptor pathways in coronary heart disease: a collaborative meta-analysis of 82 studies. *Lancet*.  
451 2012;379(9822):1205-13. Epub 2012/03/14. doi: 10.1016/S0140-6736(11)61931-4. PubMed PMID:  
452 22421339; PubMed Central PMCID: PMCPMC3316940.
- 453 11. Al Bander Z, Nitert MD, Mousa A, Naderpoor N. The Gut Microbiota and Inflammation: An  
454 Overview. *Int J Environ Res Public Health*. 2020;17(20). Epub 2020/10/19. doi:  
455 10.3390/ijerph17207618. PubMed PMID: 33086688; PubMed Central PMCID: PMCPMC7589951.
- 456 12. Wensley F, Gao P, Burgess S, Kaptoge S, Di Angelantonio E, Shah T, et al. Association  
457 between C reactive protein and coronary heart disease: mendelian randomisation analysis based on  
458 individual participant data. *BMJ*. 2011;342:d548. Epub 2011/02/15. doi: 10.1136/bmj.d548. PubMed  
459 PMID: 21325005; PubMed Central PMCID: PMCPMC3039696.
- 460 13. Ridker PM, Libby P, MacFadyen JG, Thuren T, Ballantyne C, Fonseca F, et al. Modulation of  
461 the interleukin-6 signalling pathway and incidence rates of atherosclerotic events and all-cause  
462 mortality: analyses from the Canakinumab Anti-Inflammatory Thrombosis Outcomes Study  
463 (CANTOS). *Eur Heart J*. 2018;39(38):3499-507. doi: 10.1093/eurheartj/ehy310. PubMed PMID:  
464 30165610.
- 465 14. Dantzer R, O'Connor JC, Lawson MA, Kelley KW. Inflammation-associated depression: from  
466 serotonin to kynurenine. *Psychoneuroendocrinology*. 2011;36(3):426-36. Epub 2010/10/30. doi:  
467 10.1016/j.psyneuen.2010.09.012. PubMed PMID: 21041030; PubMed Central PMCID:  
468 PMCPMC3053088.
- 469 15. Courtet P, Jaussent I, Genty C, Dupuy AM, Guillaume S, Ducasse D, et al. Increased CRP  
470 levels may be a trait marker of suicidal attempt. *European Neuropsychopharmacology*.  
471 2015;25(10):1824-31. doi: 10.1016/j.euroneuro.2015.05.003. PubMed PMID: 2015-46424-016.
- 472 16. Ligthart S, Vaez A, Vösa U, Stathopoulou MG, de Vries PS, Prins BP, et al. Genome  
473 Analyses of >200,000 Individuals Identify 58 Loci for Chronic Inflammation and Highlight Pathways  
474 that Link Inflammation and Complex Disorders. *Am J Hum Genet*. 2018;103(5):691-706. doi:  
475 10.1016/j.ajhg.2018.09.009. PubMed PMID: 30388399; PubMed Central PMCID: PMCPMC6218410.

- 476 17. Coelho R, Viola TW, Walss-Bass C, Brietzke E, Grassi-Oliveira R. Childhood maltreatment  
477 and inflammatory markers: A systematic review. *Acta Psychiatrica Scandinavica*. 2014;129(3):180-92.  
478 doi: 10.1111/acps.12217. PubMed PMID: 2014-05494-003.
- 479 18. Baumeister D, Akhtar R, Ciufolini S, Pariante CM, Mondelli V. Childhood trauma and  
480 adulthood inflammation: a meta-analysis of peripheral C-reactive protein, interleukin-6 and tumour  
481 necrosis factor-alpha. *Mol Psychiatry*. 2016;21(5):642-9. Epub 2015/06/03. doi: 10.1038/mp.2015.67.  
482 PubMed PMID: 26033244; PubMed Central PMCID: PMC4564950.
- 483 19. Finy MS, Christian LM. Pathways linking childhood abuse history and current socioeconomic  
484 status to inflammation during pregnancy. *Brain Behav Immun*. 2018;74:231-40. Epub 2018/09/16. doi:  
485 10.1016/j.bbi.2018.09.012. PubMed PMID: 30217532; PubMed Central PMCID: PMC6289854.
- 486 20. Matthews KA, Chang Y-F, Thurston RC, Bromberger JT. Child abuse is related to  
487 inflammation in mid-life women: Role of obesity. *Brain, Behavior, and Immunity*. 2014;36:29-34. doi:  
488 10.1016/j.bbi.2013.09.013. PubMed PMID: 2014-01804-006.
- 489 21. Moher D, Liberati A, Tetzlaff J, Altman DG, Group P. Preferred reporting items for systematic  
490 reviews and meta-analyses: the PRISMA statement. *PLoS Med*. 2009;6(7):e1000097. Epub  
491 2009/07/21. doi: 10.1371/journal.pmed.1000097. PubMed PMID: 19621072; PubMed Central PMCID:  
492 PMC2707599.
- 493 22. Bernstein DP, Fink L, Handelsman L, Foote J, Lovejoy M, Wenzel K, et al. Initial reliability and  
494 validity of a new retrospective measure of child abuse and neglect. *Am J Psychiatry*.  
495 1994;151(8):1132-6. doi: 10.1176/ajp.151.8.1132. PubMed PMID: 8037246.
- 496 23. Bremner JD, Vermetten E, Mazure CM. Development and preliminary psychometric  
497 properties of an instrument for the measurement of childhood trauma: the Early Trauma Inventory.  
498 *Depress Anxiety*. 2000;12(1):1-12. doi: 10.1002/1520-6394(2000)12:1<1::AID-DA1>3.0.CO;2-W.  
499 PubMed PMID: 10999240.
- 500 24. Counotte J, Bergink V, Pot-Kolder R, Drexhage HA, Hoek HW, Veling W. Inflammatory  
501 cytokines and growth factors were not associated with psychosis liability or childhood trauma. *PLoS*  
502 *One*. 2019;14(7):e0219139. Epub 2019/07/06. doi: 10.1371/journal.pone.0219139. PubMed PMID:  
503 31276524; PubMed Central PMCID: PMC6611659.
- 504 25. Imai R, Hori H, Itoh M, Lin M, Niwa M, Ino K, et al. Inflammatory markers and their possible  
505 effects on cognitive function in women with posttraumatic stress disorder. *J Psychiatr Res*.  
506 2018;102:192-200. Epub 2018/04/24. doi: 10.1016/j.jpsychires.2018.04.009. PubMed PMID:  
507 29684628.
- 508 26. Palmos AB, Watson S, Hughes T, Finkelmeyer A, McAllister-Williams RH, Ferrier N, et al.  
509 Associations between childhood maltreatment and inflammatory markers. *BJPsych Open*.  
510 2019;5(1):e3. Epub 2019/02/15. doi: 10.1192/bjo.2018.80. PubMed PMID: 30762500; PubMed  
511 Central PMCID: PMC6343120.
- 512 27. Zeugmann S, Quante A, Popova-Zeugmann L, Kössler W, Heuser I, Angheliescu I. Pathways  
513 linking early life stress, metabolic syndrome, and the inflammatory marker fibrinogen in depressed  
514 inpatients. *Psychiatria Danubina*. 2012;24(1):57-65. PubMed PMID: 2012-09083-007.
- 515 28. de Punder K, Entringer S, Heim C, Deuter CE, Otte C, Wingenfeld K, et al. Inflammatory  
516 Measures in Depressed Patients With and Without a History of Adverse Childhood Experiences. *Front*  
517 *Psychiatry*. 2018;9:610. Epub 2018/12/13. doi: 10.3389/fpsy.2018.00610. PubMed PMID: 30538644;  
518 PubMed Central PMCID: PMC6277546.
- 519 29. Aas M, Dieset I, Hope S, Hoseth E, Morch R, Reponen E, et al. Childhood maltreatment  
520 severity is associated with elevated C-reactive protein and body mass index in adults with  
521 schizophrenia and bipolar diagnoses. *Brain Behav Immun*. 2017;65:342-9. Epub 2017/06/18. doi:  
522 10.1016/j.bbi.2017.06.005. PubMed PMID: 28619247.
- 523 30. Fanning JR, Lee R, Gozal D, Coussons-Read M, Coccaro EF. Childhood trauma and parental  
524 style: Relationship with markers of inflammation, oxidative stress, and aggression in healthy and  
525 personality disordered subjects. *Biological Psychology*. 2015;112:56-65. doi:  
526 10.1016/j.biopsycho.2015.09.003. PubMed PMID: 2015-52970-009.
- 527 31. Hepgul N, Pariante CM, Dipsasquale S, DiForti M, Taylor H, Marques TR, et al. Childhood  
528 maltreatment is associated with increased body mass index and increased C-reactive protein levels in  
529 first-episode psychosis patients. *Psychol Med*. 2012;42(9):1893-901. Epub 2012/01/21. doi:  
530 10.1017/s0033291711002947. PubMed PMID: 22260948; PubMed Central PMCID:  
531 PMC4081598.
- 532 32. Quide Y, Bortolasci CC, Spolding B, Kidnapillai S, Watkeys OJ, Cohen-Woods S, et al.  
533 Association between childhood trauma exposure and pro-inflammatory cytokines in schizophrenia  
534 and bipolar-I disorder. *Psychol Med*. 2019;49(16):2736-44. Epub 2018/12/19. doi:  
535 10.1017/s0033291718003690. PubMed PMID: 30560764.

- 536 33. Baldwin JR, Arseneault L, Caspi A, Fisher HL, Moffitt TE, Odgers CL, et al. Childhood  
537 victimization and inflammation in young adulthood: A genetically sensitive cohort study. *Brain,*  
538 *behavior, and immunity.* 2018;67:211-7. doi: <https://dx.doi.org/10.1016/j.bbi.2017.08.025>.
- 539 34. Osborn M, Widom CS. Do documented records and retrospective reports of childhood  
540 maltreatment similarly predict chronic inflammation? *Psychol Med.* 2019:1-10. Epub 2019/09/24. doi:  
541 10.1017/s0033291719002575. PubMed PMID: 31544727.
- 542 35. Nikulina V, Widom CS. Do race, neglect, and childhood poverty predict physical health in  
543 adulthood? A multilevel prospective analysis. *Child Abuse & Neglect.* 2014;38(3):414-24. doi:  
544 10.1016/j.chiabu.2013.09.007. PubMed PMID: 2013-38953-001.
- 545 36. Anderson EL, Fraser A, Caleyachetty R, Hardy R, Lawlor DA, Howe LD. Associations of  
546 adversity in childhood and risk factors for cardiovascular disease in mid-adulthood. *Child Abuse &*  
547 *Neglect.* 2018;76:138-48. doi: 10.1016/j.chiabu.2017.10.015. PubMed PMID: 2018-04158-015.
- 548 37. Carpenter LL, Gawuga CE, Tyrka AR, Price LH. C-reactive protein, early life stress, and  
549 wellbeing in healthy adults. *Acta Psychiatr Scand.* 2012;126(6):402-10. Epub 2012/06/12. doi:  
550 10.1111/j.1600-0447.2012.01892.x. PubMed PMID: 22681496; PubMed Central PMCID:  
551 PMCPMC3580169.
- 552 38. Gong J, Wang Y, Liu J, Fu X, Cheung EFC, Chan RCK. The interaction between positive  
553 schizotypy and high sensitivity C-reactive protein on response inhibition in female individuals.  
554 *Psychiatry Res.* 2019;274:365-71. Epub 2019/03/11. doi: 10.1016/j.psychres.2019.02.064. PubMed  
555 PMID: 30852429.
- 556 39. Gouin J-P, Glaser R, Malarkey WB, Beversdorf D, Kiecolt-Glaser JK. Childhood abuse and  
557 inflammatory responses to daily stressors. *Annals of Behavioral Medicine.* 2012;44(2):287-92. doi:  
558 10.1007/s12160-012-9386-1. PubMed PMID: 2012-25446-016.
- 559 40. Hartwell KJ, Moran-Santa Maria MM, Twal WO, Shaftman S, DeSantis SM, McRae-Clark AL,  
560 et al. Association of elevated cytokines with childhood adversity in a sample of healthy adults. *Journal*  
561 *of Psychiatric Research.* 2013;47(5):604-10. doi: 10.1016/j.jpsychires.2013.01.008. PubMed PMID:  
562 2013-09208-004.
- 563 41. Kim S, Watt T, Ceballos N, Sharma S. Adverse childhood experiences and  
564 neuroinflammatory biomarkers-The role of sex. *Stress Health.* 2019;35(4):432-40. Epub 2019/05/18.  
565 doi: 10.1002/smi.2871. PubMed PMID: 31099473.
- 566 42. Powers A, Michopoulos V, Conneely K, Gluck R, Dixon H, Wilson J, et al. Emotion  
567 Dysregulation and Inflammation in African-American Women with Type 2 Diabetes. *Neural Plasticity.*  
568 2016;2016:8926840. doi: <http://dx.doi.org/10.1155/2016/8926840>.
- 569 43. Boeck C, Koenig AM, Schury K, Geiger ML, Karabatsiakos A, Wilker S, et al. Inflammation in  
570 adult women with a history of child maltreatment: The involvement of mitochondrial alterations and  
571 oxidative stress. *Mitochondrion.* 2016;30:197-207. Epub 2016/08/18. doi: 10.1016/j.mito.2016.08.006.  
572 PubMed PMID: 27530300.
- 573 44. Thurston RC, Chang Y, Barinas-Mitchell E, Von Kanel R, Richard Jennings J, Santoro N, et  
574 al. Child abuse and neglect and subclinical cardiovascular disease among midlife women.  
575 *Psychosomatic Medicine.* 2017;79(4):441-9. doi: <http://dx.doi.org/10.1097/PSY.0000000000000400>.
- 576 45. Pinto Pereira SM, Stein Merkin S, Seeman T, Power C. Understanding associations of early-  
577 life adversities with mid-life inflammatory profiles: Evidence from the UK and USA. *Brain Behav*  
578 *Immun.* 2019;78:143-52. Epub 2019/01/27. doi: 10.1016/j.bbi.2019.01.016. PubMed PMID:  
579 30682500; PubMed Central PMCID: PMC6941353.
- 580 46. Slopen N, Lewis TT, Gruenewald TL, Mujahid MS, Ryff CD, Albert MA, et al. Early life  
581 adversity and inflammation in African Americans and Whites in the Midlife in the United States  
582 Survey. *Psychosomatic Medicine.* 2010;72(7):694-701. doi: 10.1097/PSY.0b013e3181e9c16f.  
583 PubMed PMID: 2011-26515-012.
- 584 47. Bertone-Johnson ER, Whitcomb BW, Missmer SA, Karlson EW, Rich-Edwards JW.  
585 Inflammation and early-life abuse in women. *American Journal of Preventive Medicine.*  
586 2012;43(6):611-20. doi: 10.1016/j.amepre.2012.08.014. PubMed PMID: 2012-31219-008.
- 587 48. Rooks C, Veledar E, Goldberg J, Bremner JD, Vaccarino V. Early trauma and inflammation:  
588 Role of familial factors in a study of twins. *Psychosomatic Medicine.* 2012;74(2):146-52. doi:  
589 <http://dx.doi.org/10.1097/PSY.0b013e318240a7d8>.
- 590 49. Schrepf A, Markon K, Lutgendorf SK. From childhood trauma to elevated c-reactive protein in  
591 adulthood: The role of anxiety and emotional eating. *Psychosomatic Medicine.* 2014;76(5):327-36.  
592 doi: <http://dx.doi.org/10.1097/PSY.0000000000000072>.
- 593 50. Corsi-Zuelli F, Loureiro CM, Shuhama R, Fachim HA, Menezes PR, Louzada-Junior P, et al.  
594 Cytokine profile in first-episode psychosis, unaffected siblings and community-based controls: the

- 595 effects of familial liability and childhood maltreatment. *Psychol Med.* 2019;1-9. Epub 2019/05/09. doi:  
596 10.1017/s0033291719001016. PubMed PMID: 31064423.
- 597 51. Porcu M, Machado RCB, Urbano M, Verri WA, Rossaneis AC, Vargas HO, et al. Depressed  
598 female smokers have higher levels of soluble tumor necrosis factor receptor 1. *Addictive Behaviors*  
599 *Reports.* 2018;7:90-5. doi: <http://dx.doi.org/10.1016/j.abrep.2018.03.004>.
- 600 52. Smith AK, Conneely KN, Kilaru V, Mercer KB, Weiss TE, Bradley B, et al. Differential immune  
601 system DNA methylation and cytokine regulation in post-traumatic stress disorder. *American Journal*  
602 *of Medical Genetics Part B: Neuropsychiatric Genetics.* 2011;156(6):700-8. doi:  
603 10.1002/ajmg.b.31212. PubMed PMID: 2014-15537-008.
- 604 53. Lu S, Peng H, Wang L, Vasish S, Zhang Y, Gao W, et al. Elevated specific peripheral  
605 cytokines found in major depressive disorder patients with childhood trauma exposure: A cytokine  
606 antibody array analysis. *Comprehensive Psychiatry.* 2013;54(7):953-61. doi:  
607 10.1016/j.comppsy.2013.03.026. PubMed PMID: 2013-15209-001.
- 608 54. Dennison U, McKernan D, Cryan J, Dinan T. Schizophrenia patients with a history of  
609 childhood trauma have a pro-inflammatory phenotype. *Psychol Med.* 2012;42(9):1865-71. Epub  
610 2012/02/24. doi: 10.1017/s0033291712000074. PubMed PMID: 22357348.
- 611 55. Grosse L, Ambrée O, Jörgens S, Jawahar MC, Singhal G, Stacey D, et al. Cytokine levels in  
612 major depression are related to childhood trauma but not to recent stressors.  
613 *Psychoneuroendocrinology.* 2016;73:24-31. doi: 10.1016/j.psyneuen.2016.07.205. PubMed PMID:  
614 2016-46963-005.
- 615 56. Pedrotti Moreira F, Wiener CD, Jansen K, Portela LV, Lara DR, Souza LDDM, et al.  
616 Childhood trauma and increased peripheral cytokines in young adults with major depressive:  
617 Population-based study. *Journal of Neuroimmunology.* 2018;319:112-6. doi:  
618 <http://dx.doi.org/10.1016/j.jneuroim.2018.02.018>.
- 619 57. Muller N, Krause D, Barth R, Myint AM, Weidinger E, Stettinger W, et al. Childhood Adversity  
620 and Current Stress are related to Pro- and Anti-inflammatory Cytokines in Major Depression. *J Affect*  
621 *Disord.* 2019;253:270-6. Epub 2019/05/08. doi: 10.1016/j.jad.2019.04.088. PubMed PMID: 31063941.
- 622 58. Munjiza A, Kostic M, Pesic D, Gajic M, Markovic I, Tosevski DL. Higher concentration of  
623 interleukin 6 - A possible link between major depressive disorder and childhood abuse. *Psychiatry*  
624 *Research.* 2018;264:26-30. doi: <http://dx.doi.org/10.1016/j.psychres.2018.03.072>.
- 625 59. Davis MC, Lemery-Chalfant K, Yeung EW, Luecken LJ, Zautra AJ, Irwin MR. Interleukin-6  
626 and Depressive Mood Symptoms: Mediators of the Association Between Childhood Abuse and  
627 Cognitive Performance in Middle-Aged Adults. *Ann Behav Med.* 2019;53(1):29-38. Epub 2018/03/22.  
628 doi: 10.1093/abm/kay014. PubMed PMID: 29562248; PubMed Central PMCID: PMC6301312.
- 629 60. Kiecolt-Glaser JK, Gouin J-P, Weng N-P, Malarkey WB, Beversdorf DQ, Glaser R. Childhood  
630 adversity heightens the impact of later-life caregiving stress on telomere length and inflammation.  
631 *Psychosomatic Medicine.* 2011;73(1):16-22. doi: 10.1097/PSY.0b013e31820573b6. PubMed PMID:  
632 2011-26702-003.
- 633 61. Kraav SL, Tolmunen T, Karkkainen O, Ruusunen A, Viinamaki H, Mantyselka P, et al.  
634 Decreased serum total cholesterol is associated with a history of childhood physical violence in  
635 depressed outpatients. *Psychiatry Res.* 2019;272:326-33. Epub 2019/01/01. doi:  
636 10.1016/j.psychres.2018.12.108. PubMed PMID: 30597385.
- 637 62. Toft H, Neupane SP, Bramness JG, Tilden T, Wampold BE, Lien L. The effect of trauma and  
638 alcohol on the relationship between level of cytokines and depression among patients entering  
639 psychiatric treatment. *BMC Psychiatry.* 2018;18(1):95. Epub 2018/04/11. doi: 10.1186/s12888-018-  
640 1677-z. PubMed PMID: 29631540; PubMed Central PMCID: PMC6301312.
- 641 63. Baldwin JR, Reuben A, Newbury JB, Danese A. Agreement Between Prospective and  
642 Retrospective Measures of Childhood Maltreatment: A Systematic Review and Meta-analysis. *JAMA*  
643 *Psychiatry.* 2019;76(6):584-93. doi: 10.1001/jamapsychiatry.2019.0097. PubMed PMID: 30892562;  
644 PubMed Central PMCID: PMC6551848.
- 645 64. Lacey RE, Minnis H. Practitioner Review: Twenty years of research with adverse childhood  
646 experience scores - Advantages, disadvantages and applications to practice. *J Child Psychol*  
647 *Psychiatry.* 2020;61(2):116-30. Epub 2019/10/14. doi: 10.1111/jcpp.13135. PubMed PMID:  
648 31609471.
- 649 65. Lacey RE, Pinto Pereira SM, Li L, Danese A. Adverse childhood experiences and adult  
650 inflammation: Single adversity, cumulative risk and latent class approaches. *Brain Behav Immun.*  
651 2020. Epub 2020/03/24. doi: 10.1016/j.bbi.2020.03.017. PubMed PMID: 32201253.
- 652 66. Lacey RE, Howe LD, Kelly-Irving M, Bartley M, Kelly Y. The Clustering of Adverse Childhood  
653 Experiences in the Avon Longitudinal Study of Parents and Children: Are Gender and Poverty

- 654 Important? *J Interpers Violence*. 2020;886260520935096. Epub 2020/07/08. doi:  
655 10.1177/0886260520935096. PubMed PMID: 32639853.
- 656 67. Williams DR, Priest N, Anderson NB. Understanding associations among race,  
657 socioeconomic status, and health: Patterns and prospects. *Health Psychol*. 2016;35(4):407-11. doi:  
658 10.1037/hea0000242. PubMed PMID: 27018733; PubMed Central PMCID: PMC4817358.
- 659 68. Dinkler L, Lundström S, Gajwani R, Lichtenstein P, Gillberg C, Minnis H. Maltreatment-  
660 associated neurodevelopmental disorders: a co-twin control analysis. *J Child Psychol Psychiatry*.  
661 2017;58(6):691-701. Epub 2017/01/17. doi: 10.1111/jcpp.12682. PubMed PMID: 28094432.
- 662 69. Cox AJ, West NP, Cripps AW. Obesity, inflammation, and the gut microbiota. *Lancet Diabetes*  
663 *Endocrinol*. 2015;3(3):207-15. Epub 2014/07/22. doi: 10.1016/S2213-8587(14)70134-2. PubMed  
664 PMID: 25066177.
- 665 70. Shiels PG, Buchanan S, Selman C, Stenvinkel P. Allostatic load and ageing: linking the  
666 microbiome and nutrition with age-related health. *Biochem Soc Trans*. 2019;47(4):1165-72. Epub  
667 2019/08/15. doi: 10.1042/BST20190110. PubMed PMID: 31416886.
- 668 71. Mina TH, Lahti M, Drake AJ, Räikkönen K, Minnis H, Denison FC, et al. Prenatal exposure to  
669 very severe maternal obesity is associated with adverse neuropsychiatric outcomes in children.  
670 *Psychol Med*. 2017;47(2):353-62. Epub 2016/10/25. doi: 10.1017/S0033291716002452. PubMed  
671 PMID: 27776561.
- 672 72. Ioannidis K, Askelund AD, Kievit RA, van Harmelen AL. The complex neurobiology of resilient  
673 functioning after childhood maltreatment. *BMC Med*. 2020;18(1):32. Epub 2020/02/14. doi:  
674 10.1186/s12916-020-1490-7. PubMed PMID: 32050974; PubMed Central PMCID:  
675 PMC7017563.

676

677

## 678 **Supporting Information**

679 S1 File- Details of search strategy

680 S2 File- PRISMA checklist

681 S3 File- Systematic review protocol

682 S1 Table- Details of excluded articles

683 S2 Table- Results relating to other biomarkers

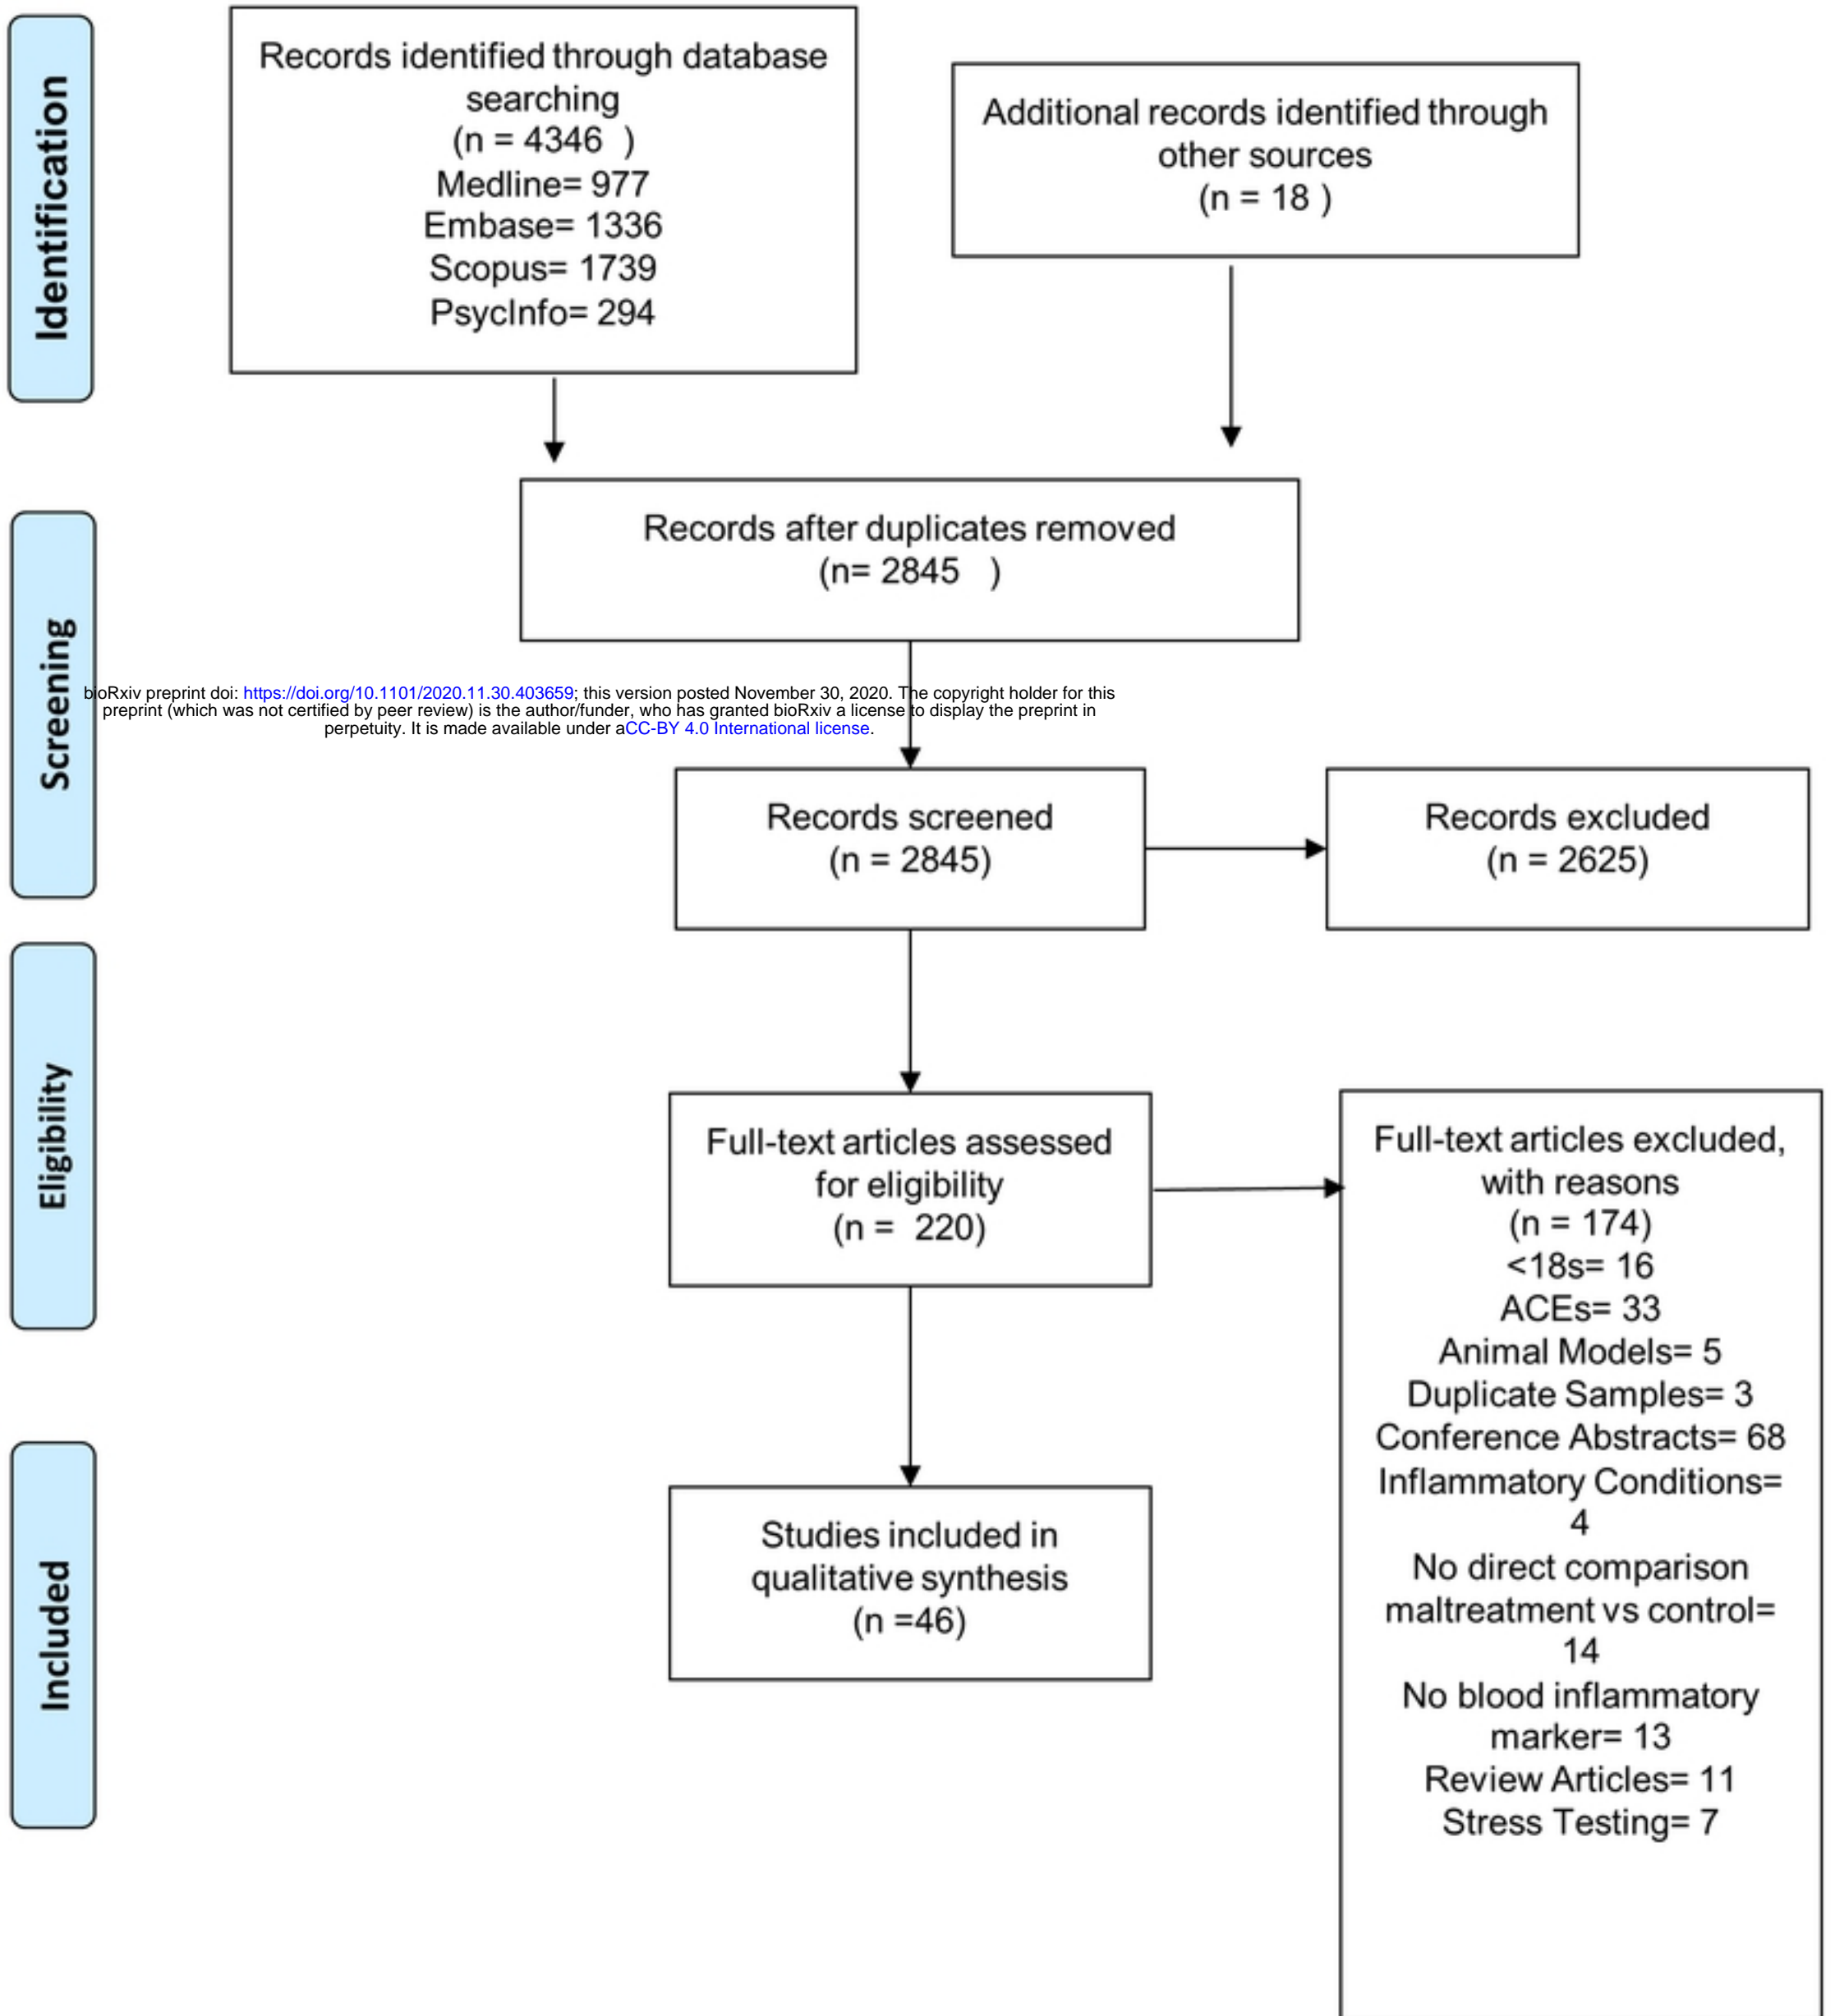

Figure 1
